# Supplementary material for: On the mechanochemical synthesis of C-scorpionates with an oxime moiety and their application in the copper-catalyzed azide–alkyne cycloaddition (CuAAC) reaction
Source: Royal Society of Chemistry journal article supplement (doi:10.1039/d3nj05017c), 2023-12-15
Supplement: d3nj05017c1.pdf [file d3nj05017c1.pdf]

**Supporting Information for:**

**On the mechanochemical synthesis of C-scorpionates with an oxime moiety  
and their application in the  
copper-catalyzed azide-alkyne cycloaddition (CuAAC) reaction**

Carla Gomes,<sup>a</sup> Mariana Costa,<sup>a</sup> Susana M. M. Lopes,<sup>a</sup> Bernardo Albuquerque Nogueira,<sup>a</sup> Rui Fausto,<sup>a,b</sup> José A. Paixão,<sup>c</sup> Teresa M. V. D. Pinho e Melo,<sup>a</sup> Luísa M. D. R. S. Martins<sup>d</sup> and Marta Pineiro,<sup>a,\*</sup>

*a. University of Coimbra, CQC-IMS and Department of Chemistry, 3004-535, Coimbra, Portugal*

*b. Faculty of Sciences and Letters, Department of Physics, Istanbul Kultur University, Ataköy Campus, Bakirköy 34156, Istanbul, Turkey*

*c. University of Coimbra, CFisUC and Department of Physics, 3004-516 Coimbra, Portugal*

*d. Centro de Química Estrutural, Institute of Molecular Sciences, Departamento de Engenharia Química, Instituto Superior Técnico, Universidade de Lisboa, Av. Rovisco Pais 1, 1049-001 Lisboa, Portugal*

**Table of contents**

|                                           |    |
|-------------------------------------------|----|
| 1. Synthesis of oximes                    | 2  |
| 2. Synthesis of C-scorpionates            | 7  |
| 3. Copper C-scorpionates complexes        | 5  |
| 4. Infrared and Raman characterization    | 17 |
| 5. Characterization of the CuAAC products | 21 |
| 6. Sustainability metrics                 | 27 |
| 7. XRD supplementary Material             | 29 |
| 8. References                             | 40 |

## 1. Synthesis of oximes

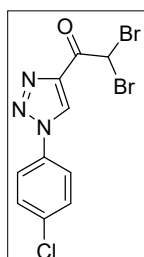

**1-(1-*p*-Chlorophenyl-1*H*-1,2,3-triazol-4-yl)-2,2-dibromoethanone:** A solution of bromine (9 mmol, 0.46 mL) in glacial acetic acid (3 mL) was added dropwise to a solution of 1,2,3-triazolyethanone (4.5 mmol, 1 g) in glacial acetic acid (15 mL). The mixture was heated at 40 °C for 40 h. After this time, the mixture was allowed to cool to room temperature. The solid in suspension was filtered and washed with ethanol 50% and dried under vacuum. Compound **T2** was obtained as a white solid in 91% yield (4.10 mmol, 1.54 g), mp 174.6-175.0 °C (from ethyl acetate/hexane); IR (ATR)  $\nu$  833, 1012, 1258, 1497, 1527, 1699, 2934 and 3146  $\text{cm}^{-1}$ .  $^1\text{H}$  NMR  $\delta$  ( $\text{CDCl}_3$ ) 7.18 (s, 1H), 7.55-7.59 (m, 2H), 7.72-7.76 (m, 2H), 8.68 (s, 1H);  $^{13}\text{C}$  NMR  $\delta$  ( $\text{CDCl}_3$ ) 38.8, 122.1, 125.9, 130.4, 134.5, 136.1, 142.6, 180.1; HRMS (ESI)  $m/z$ :  $[\text{M}+\text{H}^+]$  Calcd. for  $\text{C}_{10}\text{H}_7\text{N}_3\text{OBr}_2\text{Cl}$  377.8639; found 377.8636.

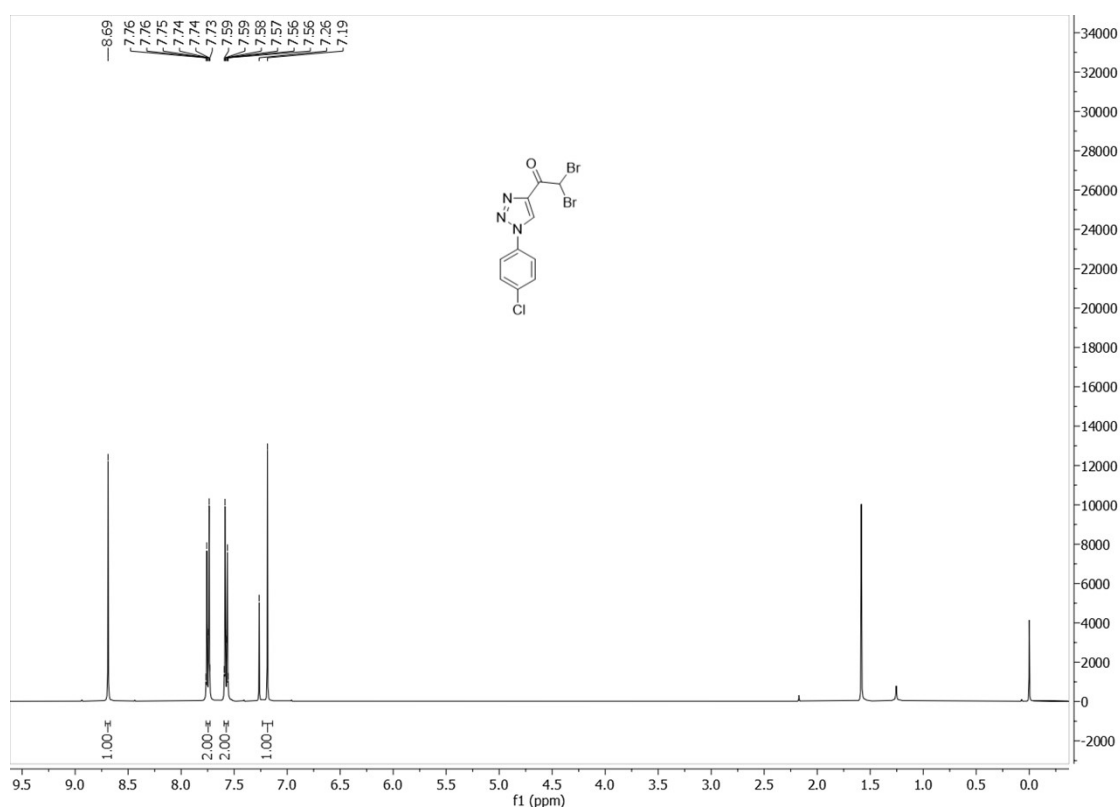

**Figure S1.**  $^1\text{H}$  NMR of 1-(1-*p*-Chlorophenyl-1*H*-1,2,3-triazol-4-yl)-2,2-dibromoethanone (400 MHz,  $\text{CDCl}_3$ ).

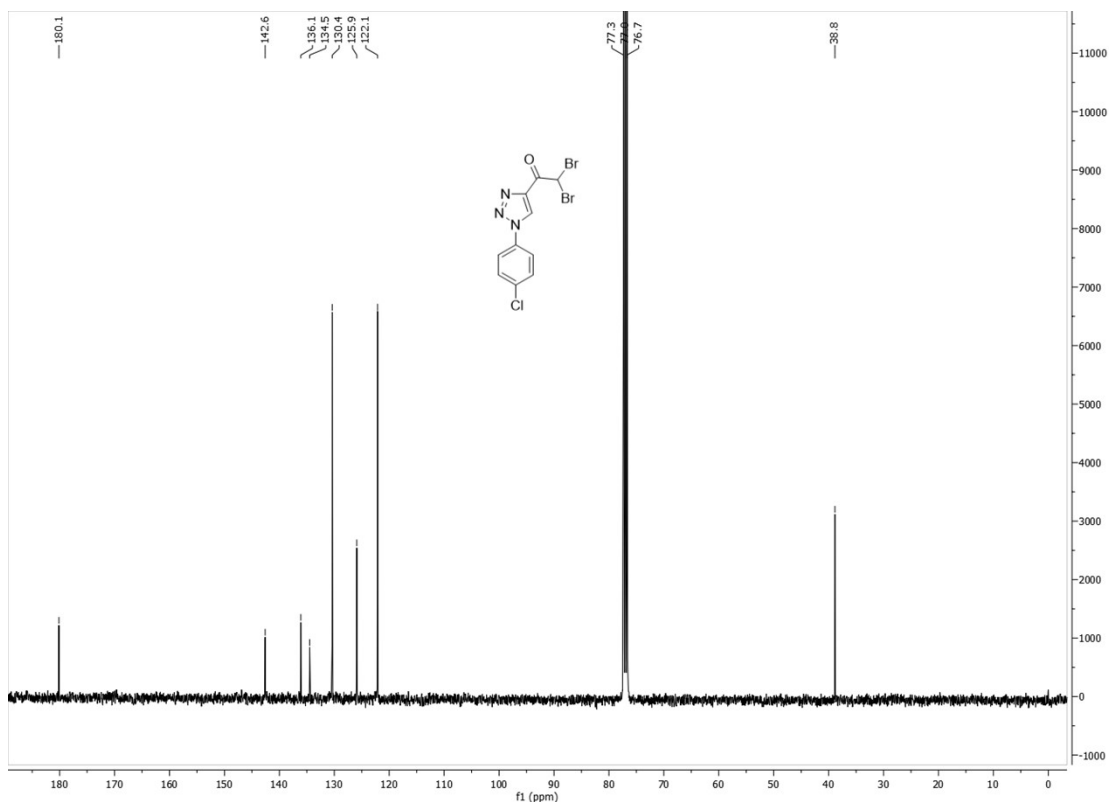

**Figure S2.**  $^{13}\text{C}$  NMR of 1-(1-p-Chlorophenyl-1H-1,2,3-triazol-4-yl)-2,2-dibromoethanone (100 MHz,  $\text{CDCl}_3$ ).

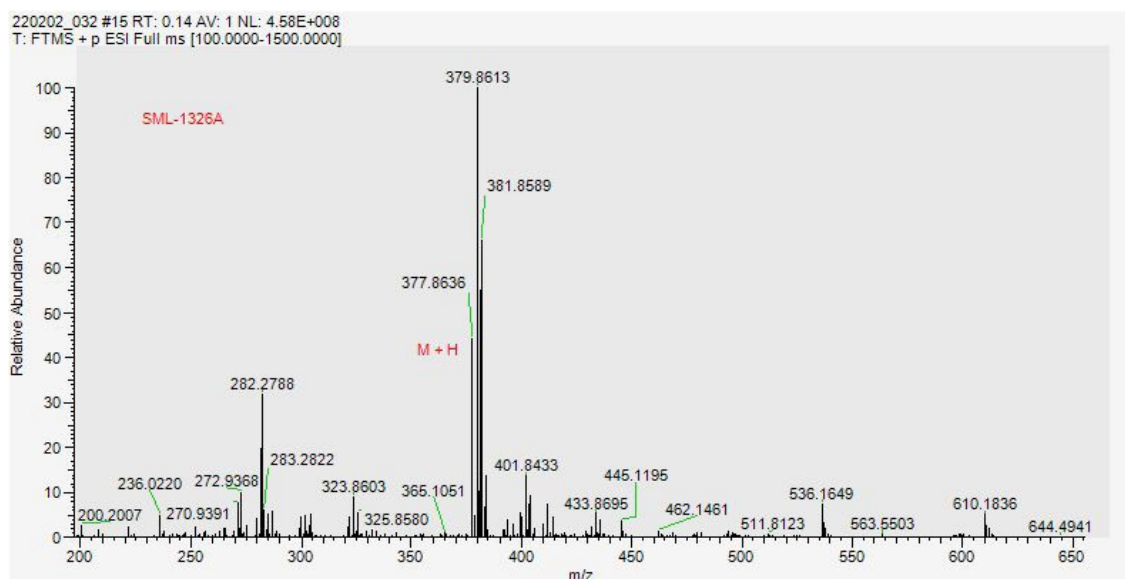

Descripción de la muestra: Sólida

| Display Formula                                                    | S Fit | RDB | Delta [ppm] | Theo. mass | Combined Score |
|--------------------------------------------------------------------|-------|-----|-------------|------------|----------------|
| $\text{C}_{10}\text{H}_7\text{ON}_3^{79}\text{Br}_2^{35}\text{Cl}$ | 81,6  | 7,5 | -0,89       | 377,86389  | 98,35          |

**Figure S3.** High-Resolution Mass Spectrum of 1-(1-p-Chlorophenyl-1H-1,2,3-triazol-4-yl)-2,2-dibromoethanone (ESI-TOF).

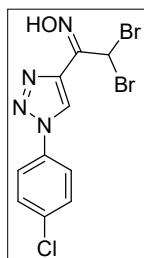

**1-(1-*p*-Chlorophenyl-1*H*-1,2,3-triazol-4-yl)-2,2-dibromoethanone oxime (4b):** Hydroxylamine hydrochloride (18 mmol, 1.25 g) was added to a solution of 1-(1-*p*-Chlorophenyl-1*H*-1,2,3-triazol-4-yl)-2,2-dibromoethanone (3 mmol, 1.13 g) in ethanol (50 mL). The mixture was stirred at room temperature, monitored by TLC until all the 1-(1-*p*-Chlorophenyl-1*H*-1,2,3-triazol-4-yl)-2,2-dibromoethanone was consumed (ca. 5 d). The solvents were evaporated. The crude product was triturated with water, filtered, washed with water and dried under vacuum. Oxime **4b** was obtained as a white solid in 81% yield (2.43 mmol, 0.96 g). mp 169.7-171.0 °C (from ethanol); IR (ATR)  $\nu$  718, 826, 972, 1031, 1093, 1253, 1499 and 3249  $\text{cm}^{-1}$ ;  $^1\text{H}$  NMR  $\delta$  (Acetone- $d_6$ ) 7.38 (s, 1H), 7.68-7.72 (m, 2H), 8.05-8.09 (m, 2H), 9.35 (s, 1H), 12.00 (s, 1H);  $^{13}\text{C}$  NMR  $\delta$  (Acetone- $d_6$ ) 67.6, 122.5, 126.9, 129.9, 134.3, 135.6, 135.8, 145.6; HRMS (ESI-TOF)  $m/z$ :  $[\text{M}+\text{H}^+]$  Calcd. for  $\text{C}_{10}\text{H}_8\text{N}_4\text{OBr}_2\text{Cl}$  392.8748; found 392.8736.

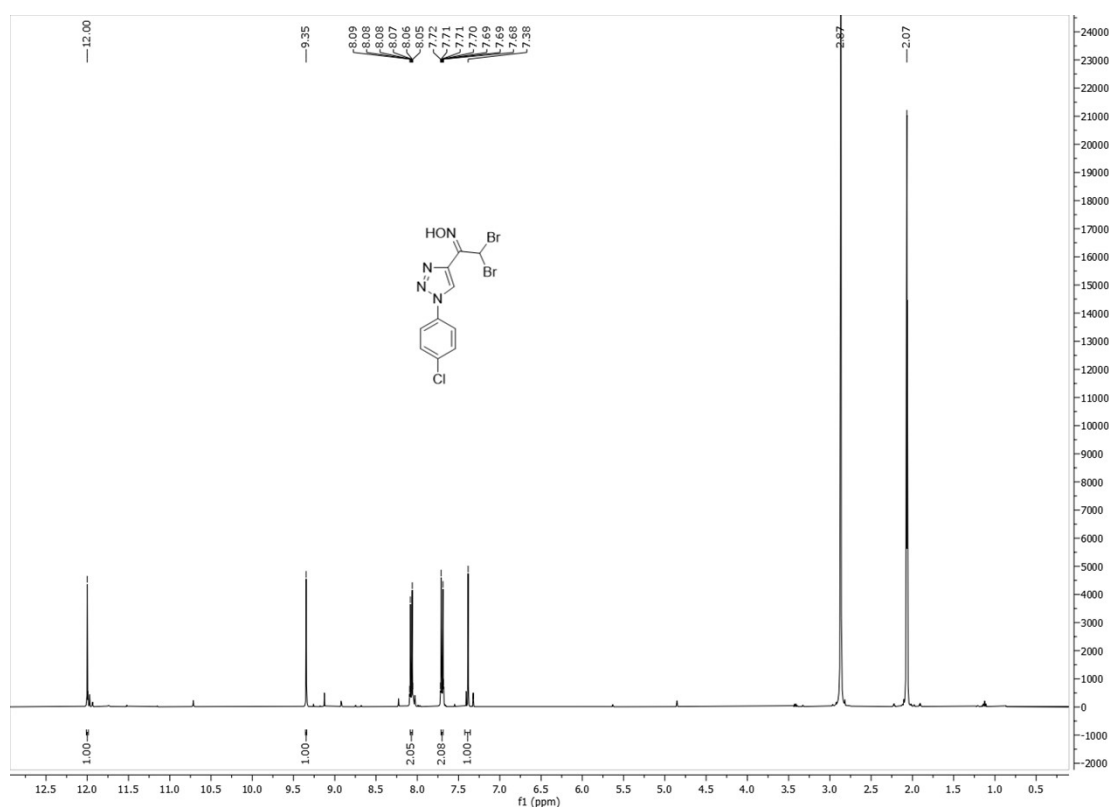

**Figure S4.**  $^1\text{H}$  NMR of 1-(1-*p*-chlorophenyl-1*H*-1,2,3-triazol-4-yl)-2,2-dibromoethanone oxime (**4b**) (400 MHz,  $\text{DMSO}-d_6$ ).

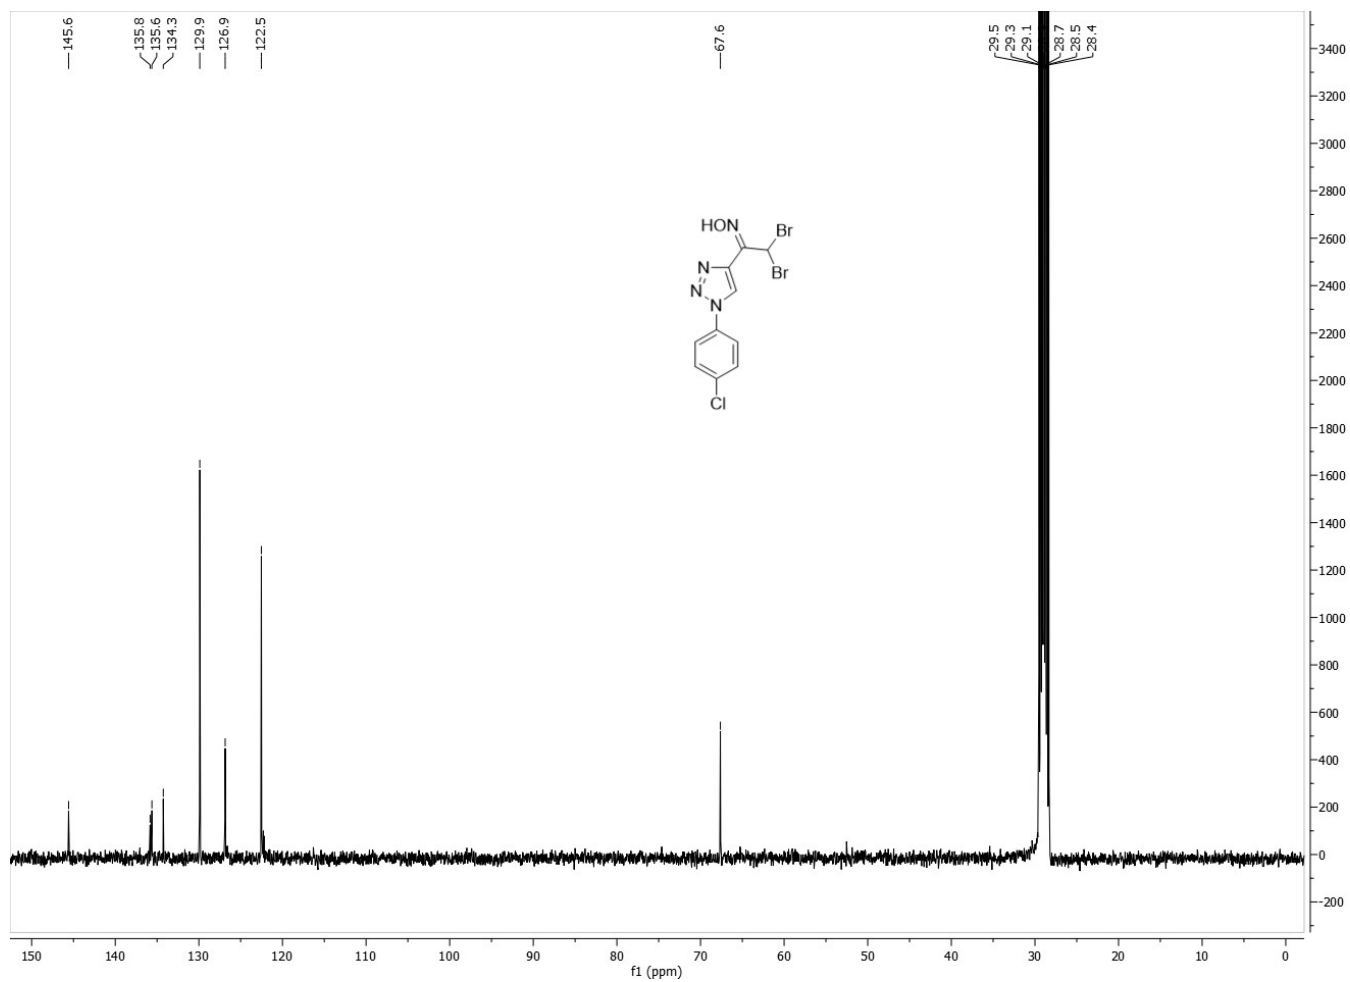

**Figure S5.** <sup>13</sup>C NMR of 1-(1-*p*-chlorophenyl-1*H*-1,2,3-triazol-4-yl)-2,2-dibromoethanone oxime (**4b**) (100 MHz, DMSO-*d*<sub>6</sub>).

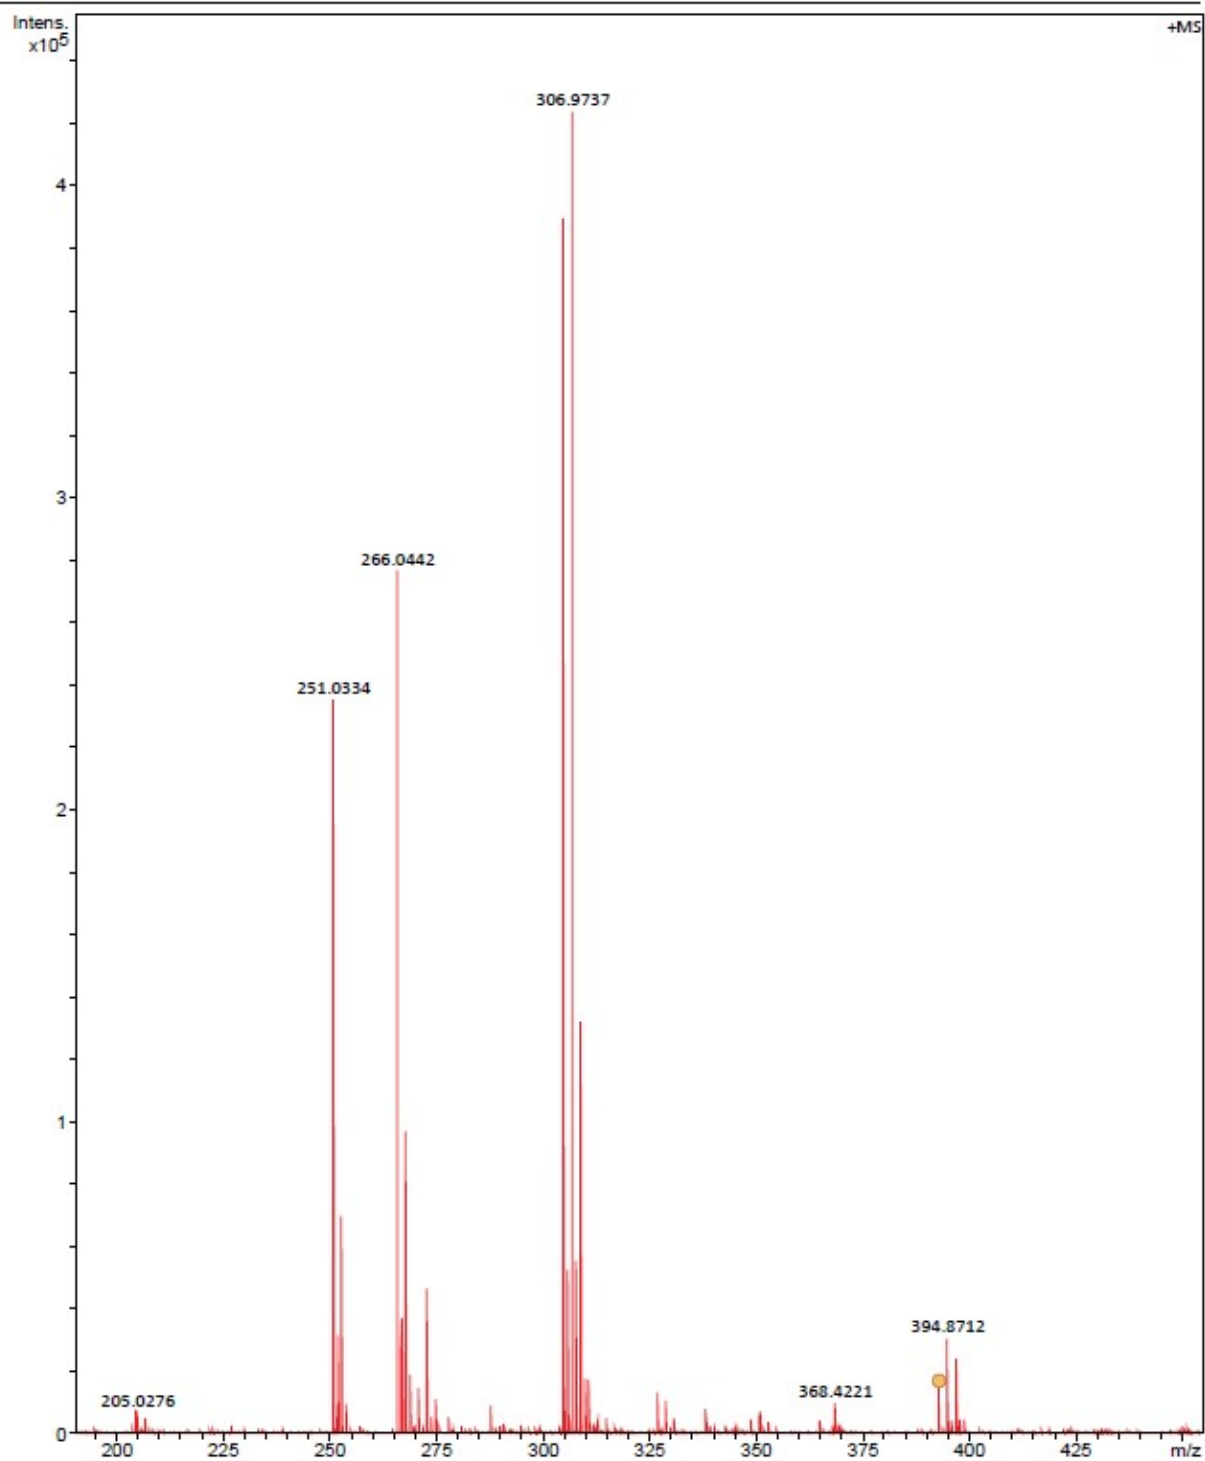

### Mass Spectrum Molecular Formula Report

| Meas. m/z | # | Ion Formula                                                       | m/z      | err [ppm] | mSigma | # mSigma | Score  | rdb | e <sup>-</sup> Conf | N-Rule |
|-----------|---|-------------------------------------------------------------------|----------|-----------|--------|----------|--------|-----|---------------------|--------|
| 392.8736  | 1 | C <sub>10</sub> H <sub>8</sub> Br <sub>2</sub> CIN <sub>4</sub> O | 392.8748 | 2.9       | 45.1   | 1        | 100.00 | 7.5 | even                | ok     |

**Figure S6.** High-Resolution Mass Spectrum of 1-(1-*p*-chlorophenyl-1*H*-1,2,3-triazol-4-yl)-2,2-dibromoethanone oxime (**4b**) (ESI-TOF).

## 2. Synthesis of C-scorpionates

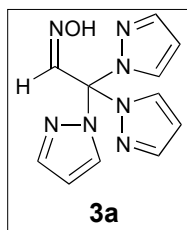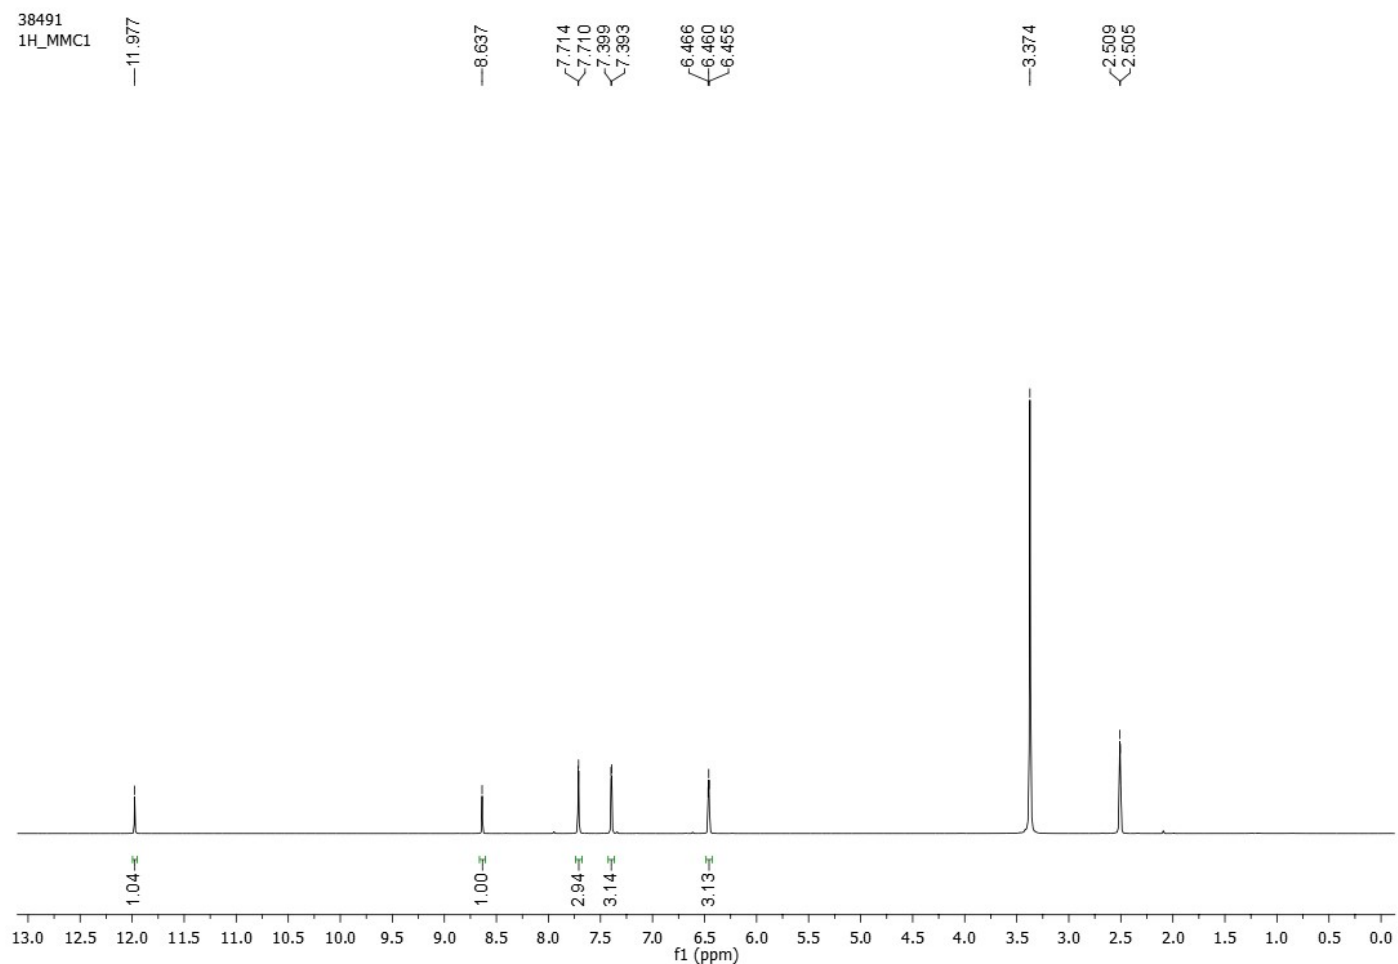

Figure S7 <sup>1</sup>H-NMR of compound **3a** (400 MHz, DMSO-d<sub>6</sub>).

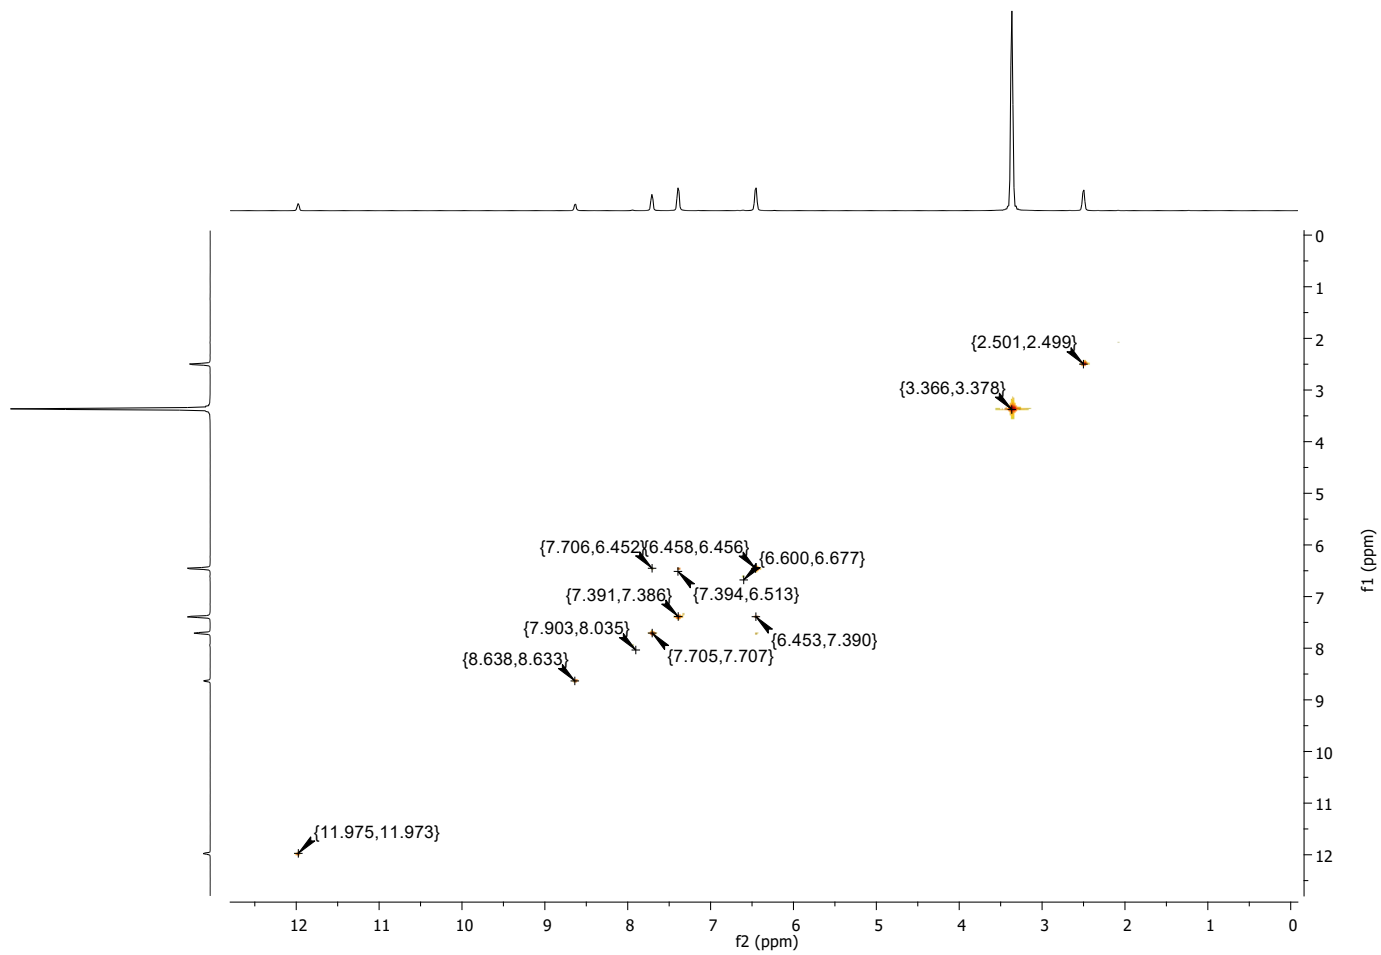

Figure S8. NOESY Spectrum



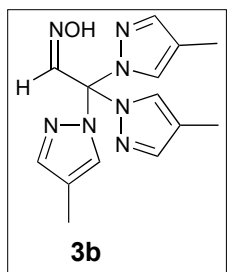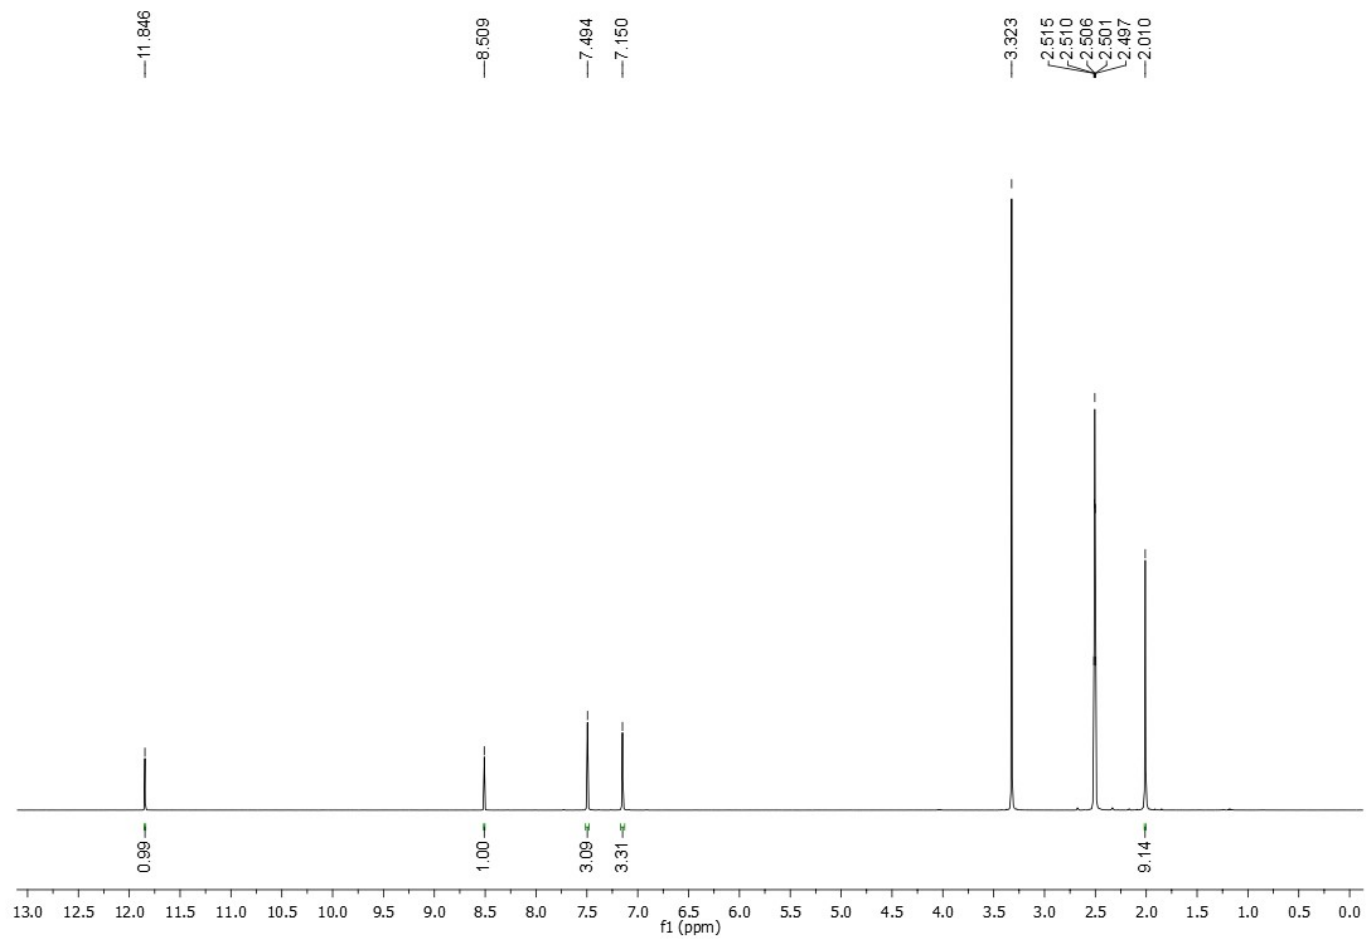

**Figure S9**  $^1\text{H-NMR}$  of compound **3b** (400 MHz,  $\text{DMSO-d}_6$ ).

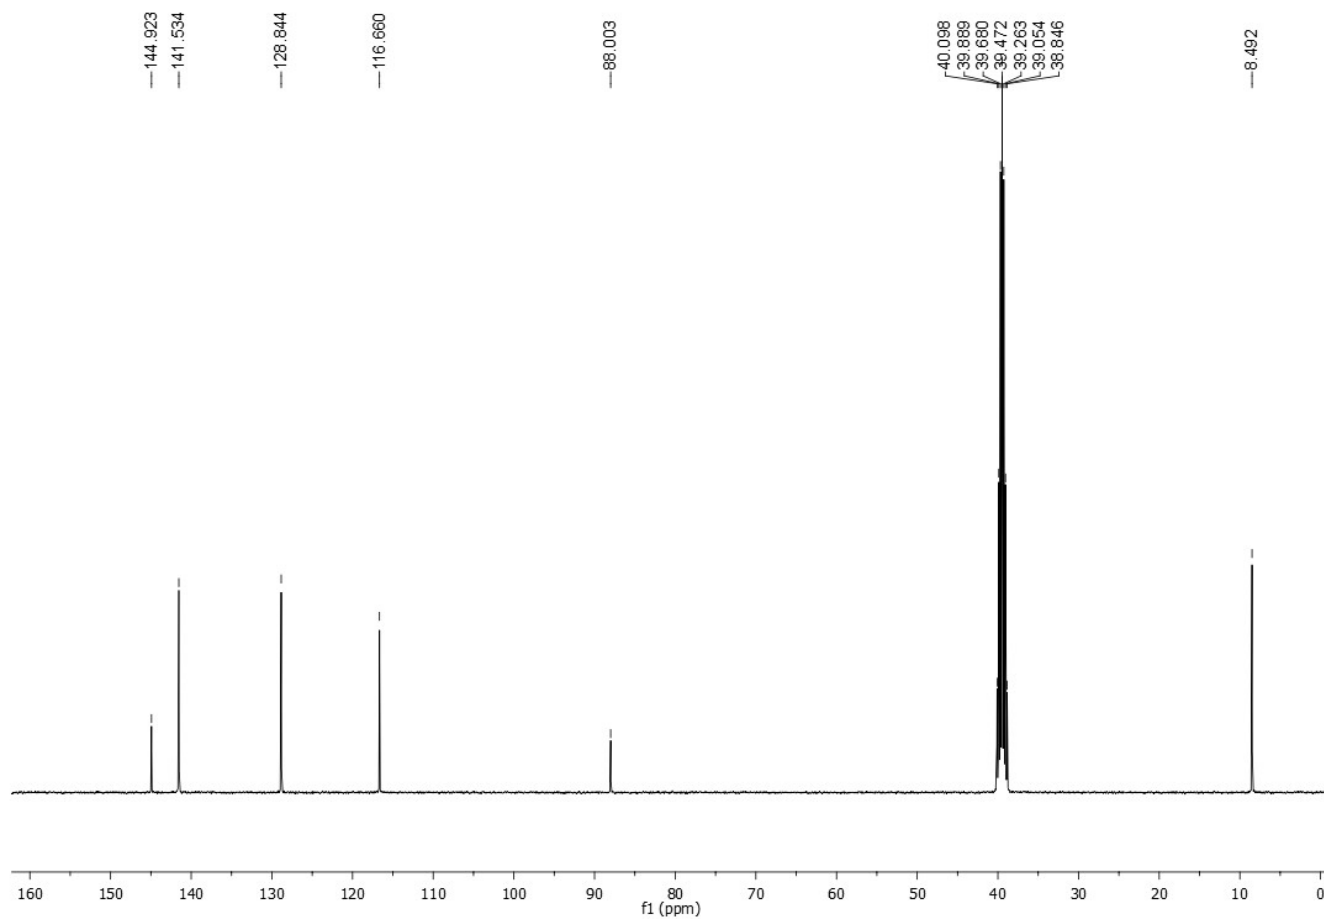

**Figure S10**  $^{13}\text{C}$ -NMR of compound **3b**. (100 MHz,  $\text{DMSO-d}_6$ ).

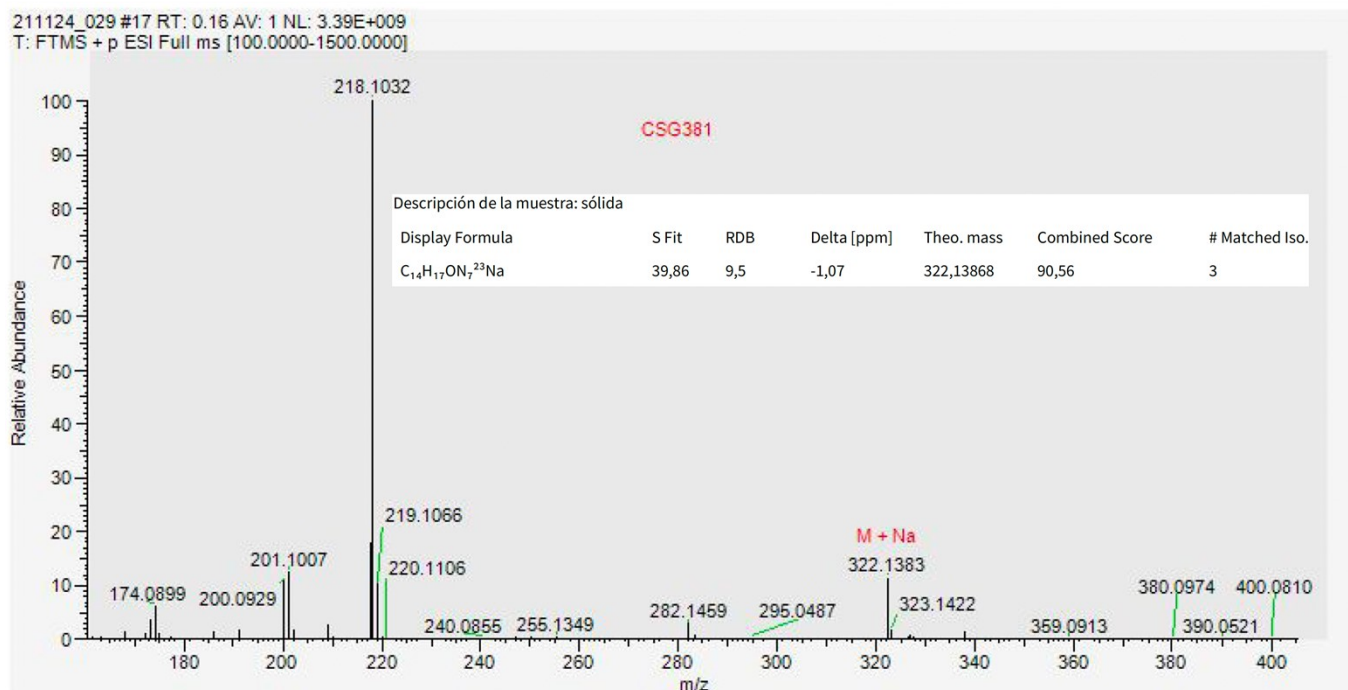

**Figure S11** HRMS spectrum of compound **3b**.

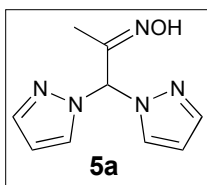

28976  
1H\_CSG355

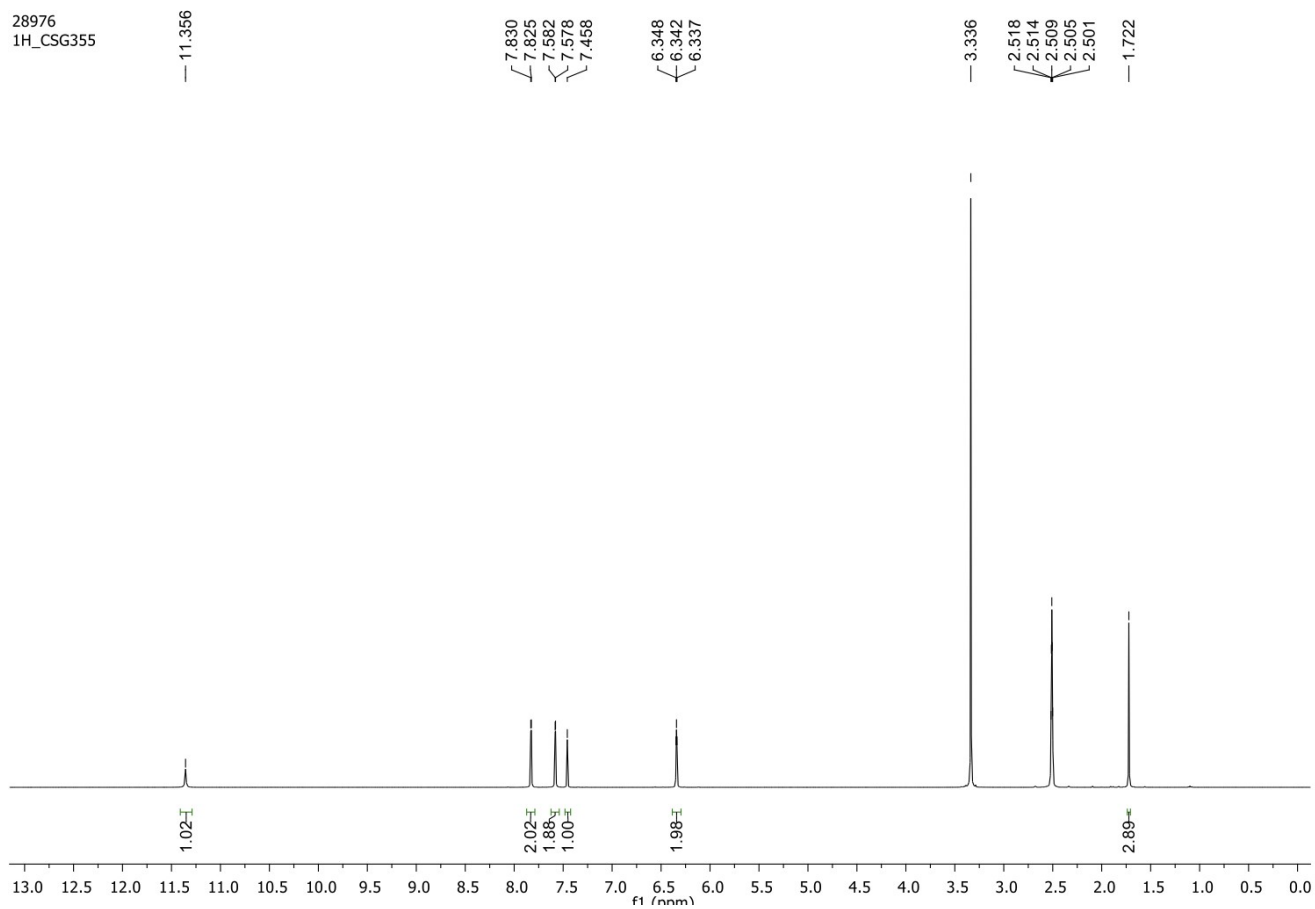

Figure S12  $^1\text{H-NMR}$  of compound **5a** (400 MHz,  $\text{DMSO-d}_6$ ).

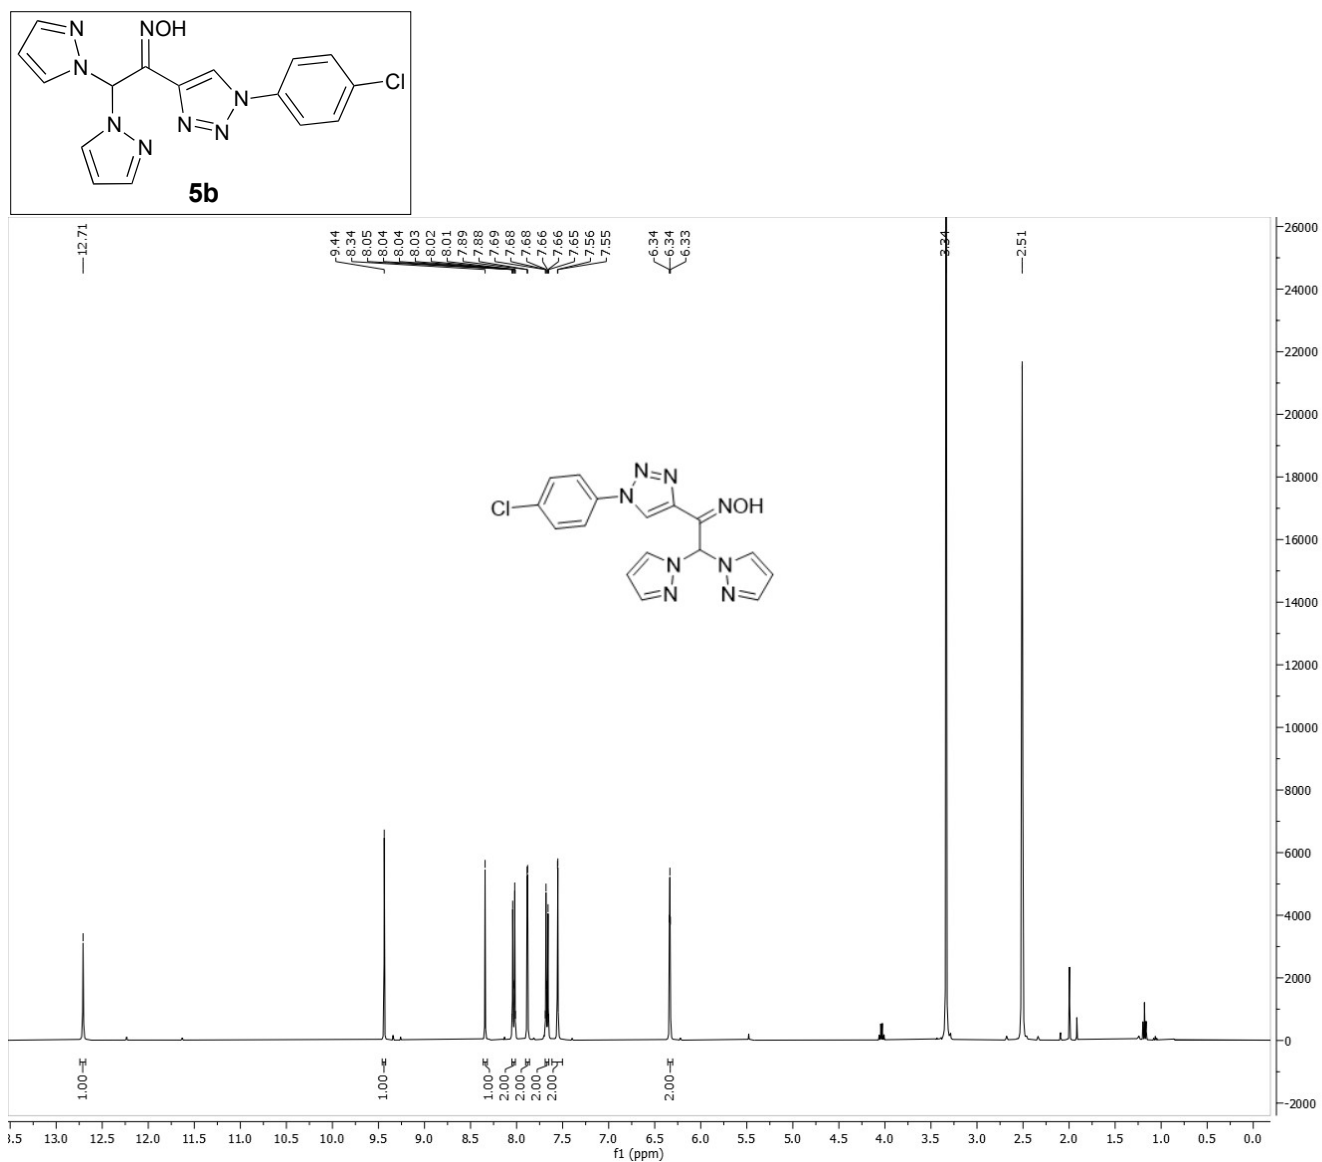

Figure S13 <sup>1</sup>H-NMR of compound **5b** (400 MHz, DMSO-d<sub>6</sub>).

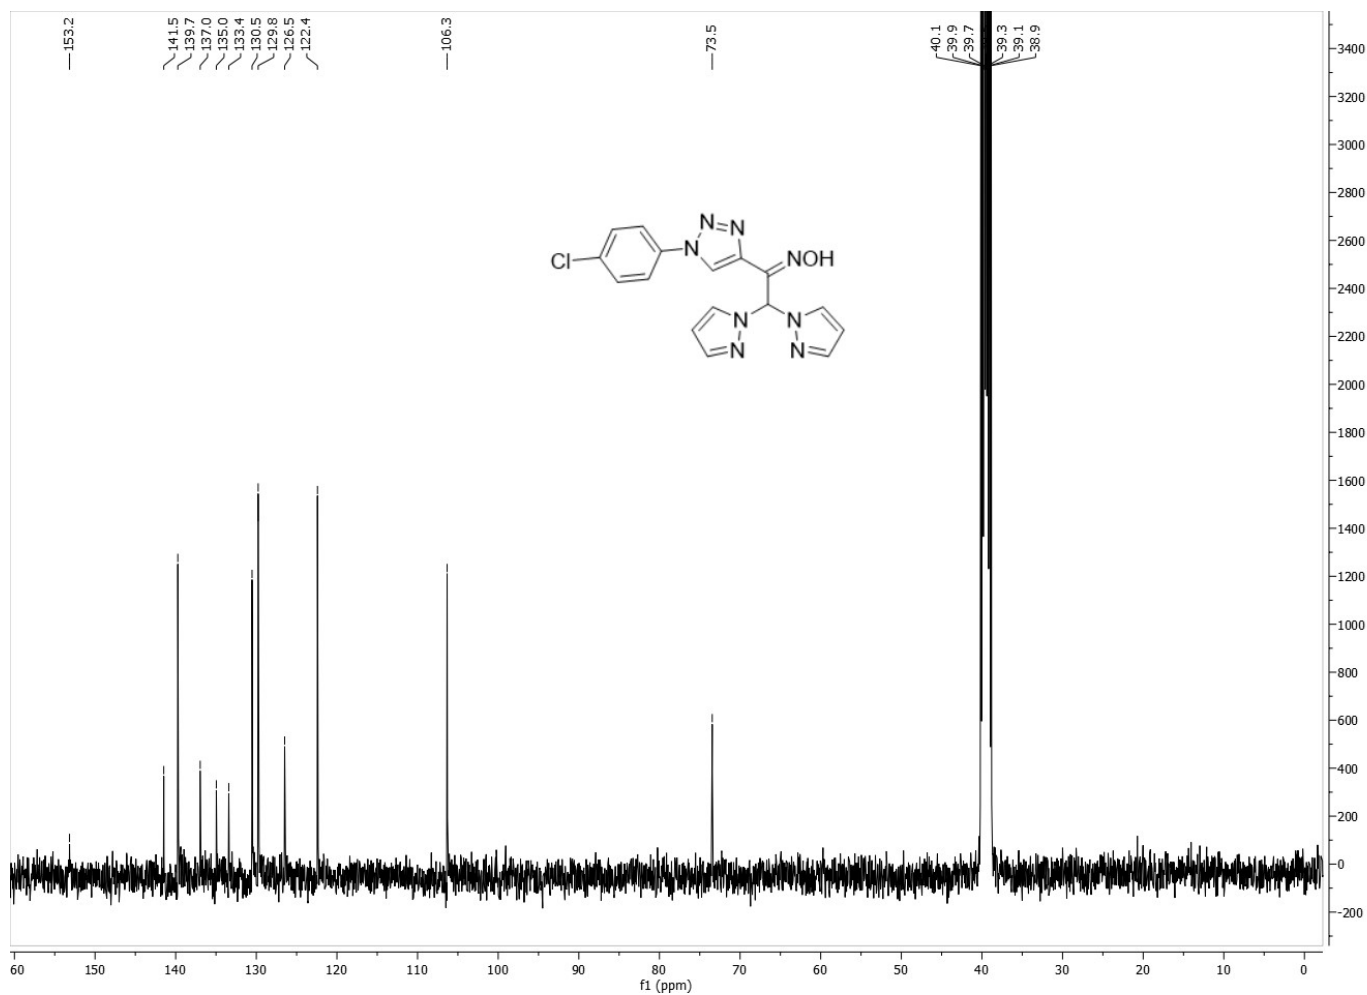

Figure S14  $^{13}\text{C}$ -NMR of compound **5b** (100 MHz,  $\text{DMSO-d}_6$ ).

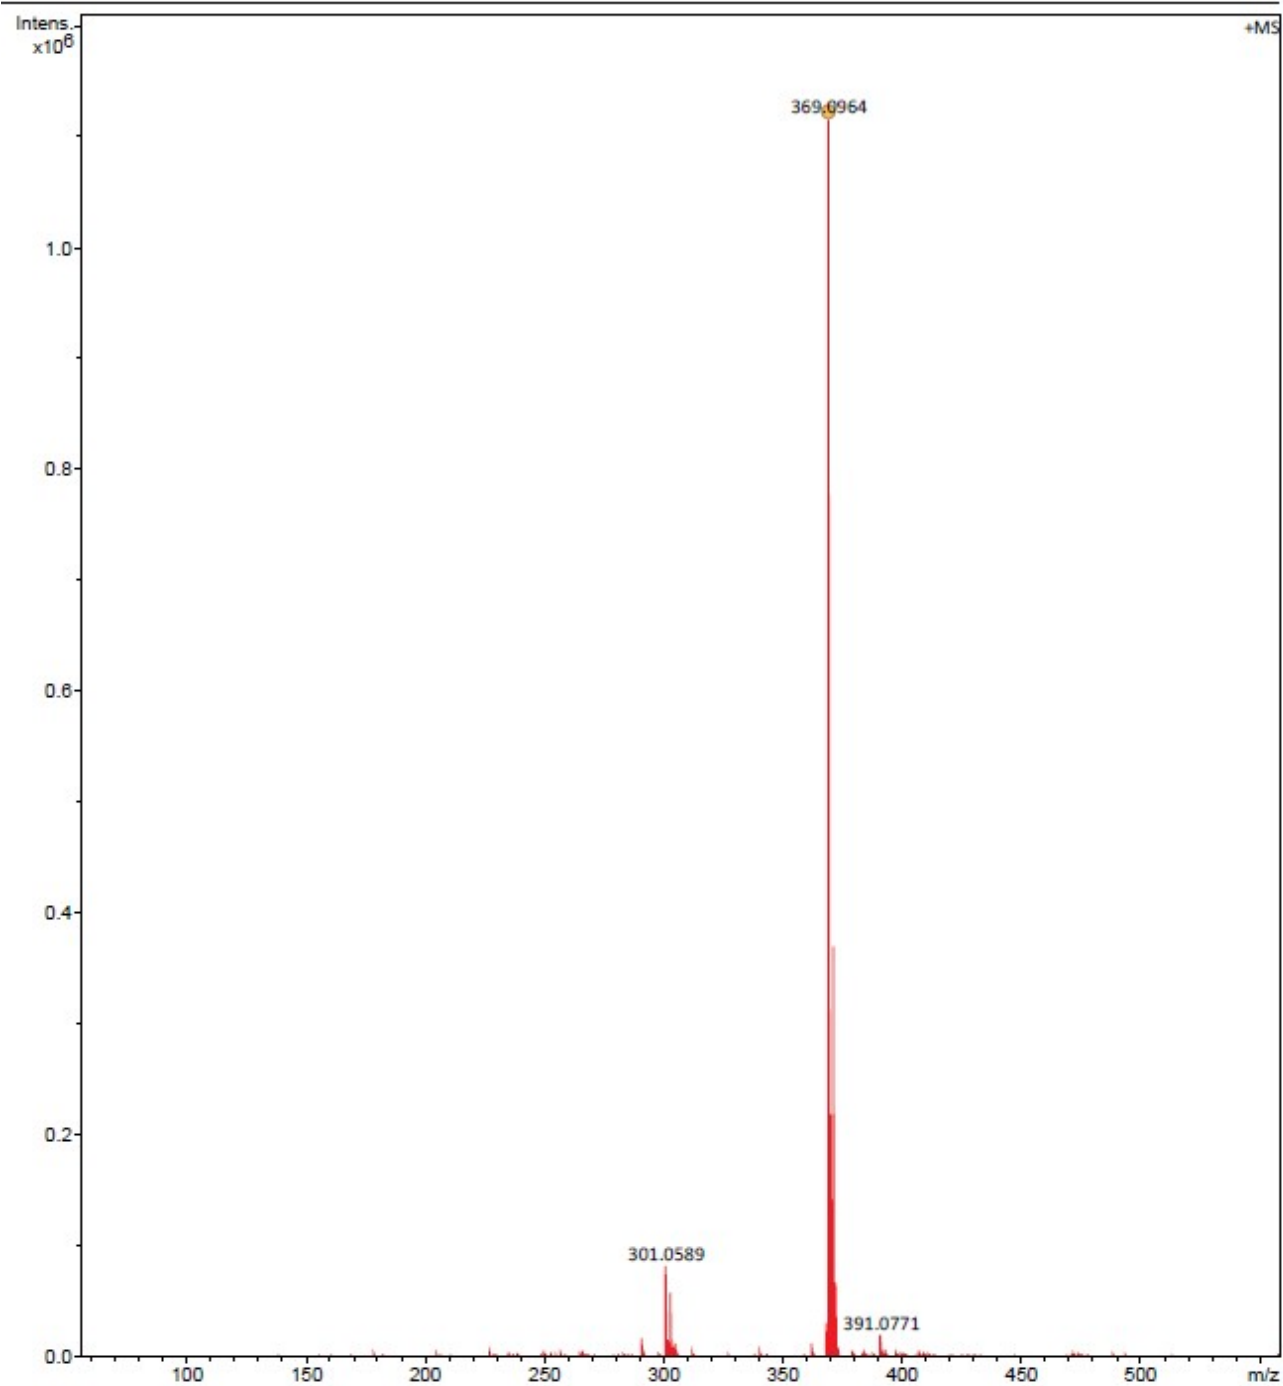

### Mass Spectrum Molecular Formula Report

| Meas. m/z | # | Ion Formula                                        | m/z      | err [ppm] | mSigma | # mSigma | Score  | rdb  | e <sup>-</sup> Conf | N-Rule |
|-----------|---|----------------------------------------------------|----------|-----------|--------|----------|--------|------|---------------------|--------|
| 369.0964  | 1 | C <sub>16</sub> H <sub>14</sub> ClN <sub>8</sub> O | 369.0974 | 2.6       | 7.5    | 1        | 100.00 | 13.5 | even                | ok     |

Figure S15 HRMS spectrum of compound **5b**.

### 3. Copper C-Scorpionates

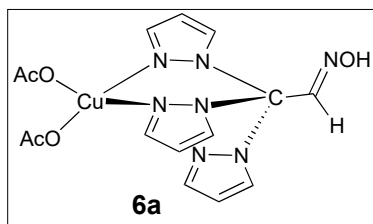

MMC2\_pos1 #4-66 RT: 0.02-0.29 AV: 63 NL: 1.67E9  
T: FTMS + p ESI Full ms [100.0000-1000.0000]

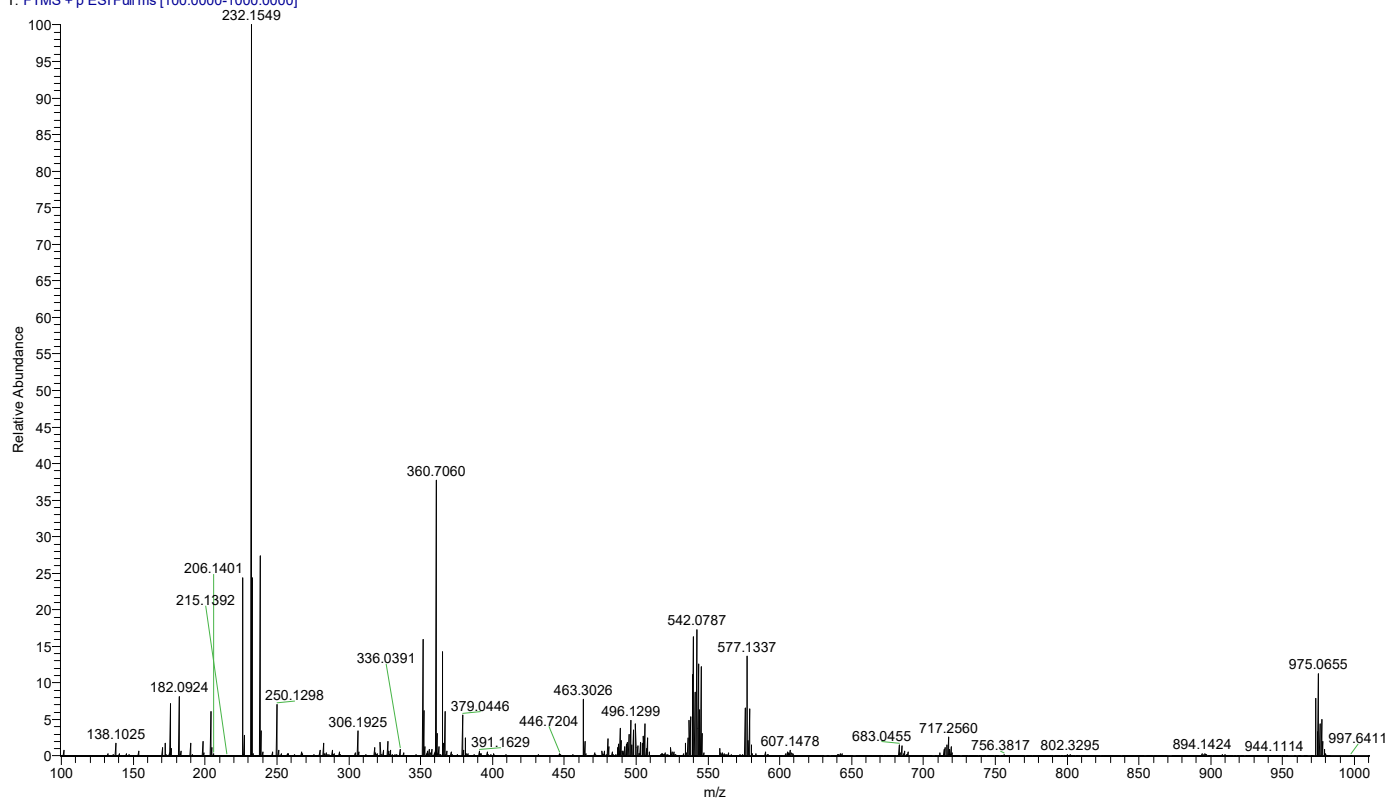

Figure S16 HRMS spectrum of compound 6a.

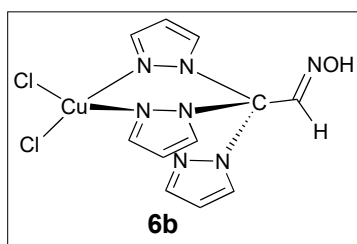

HRMS of **6b** obtained in solution

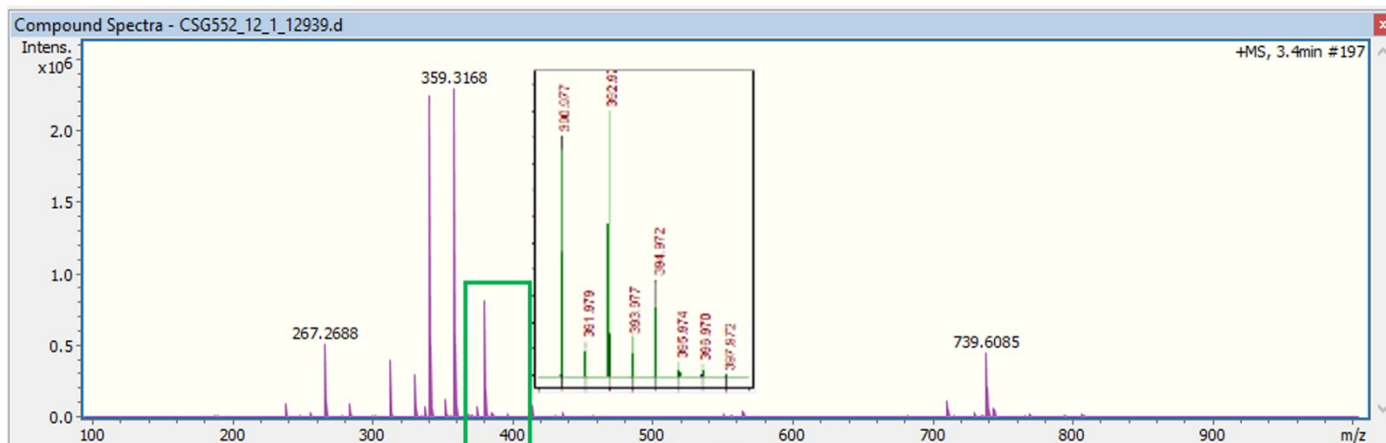

HRMS of **6b** obtained via mechanochemistry

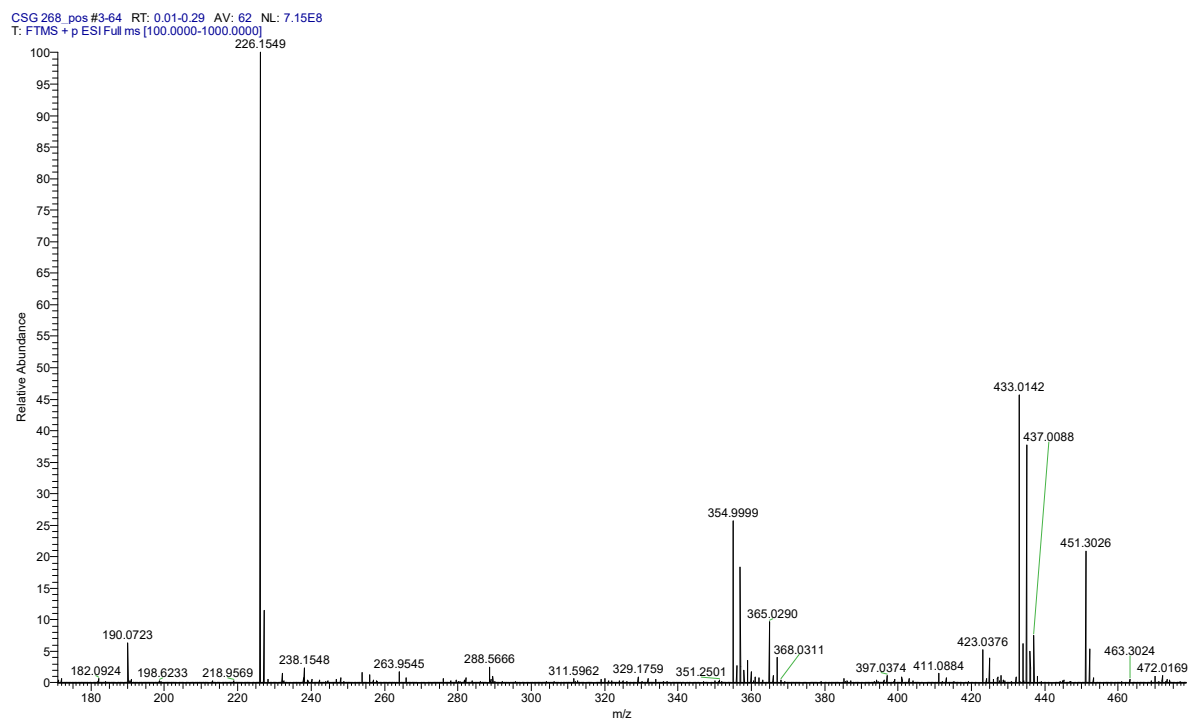

Figure S17. HRMS spectrum of compound **6b**.



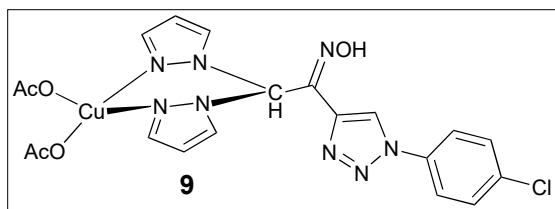

**Figure S18.** HRMS spectrum of compound **9**

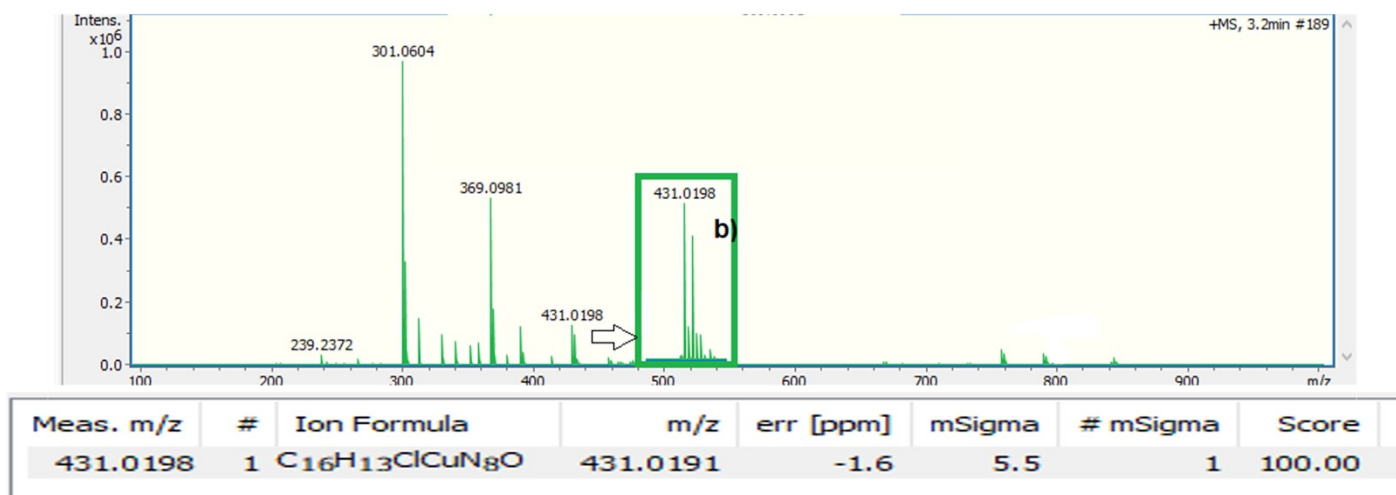

## 4. Infrared and Raman characterization

**Table S1.** Experimental and calculated bands (B3LYP/6-311++G(d,p). (scale factor 0.977) from the infrared and Raman spectra of 2,2,2-tris(1*H*-pyrazol-1-yl)acetaldehyde oxime (**3a**) (frequencies in cm<sup>-1</sup>) with the proposed vibration.

| IR        |      | Raman |      | Approximate description |
|-----------|------|-------|------|-------------------------|
| Exp       | Calc | Exp   | Calc |                         |
| 3289      | 3468 | 3271  | 3436 | vOH                     |
| 3148      | 3214 | 3144  | 3214 | vCH                     |
| 3130      | 3202 | 3133  | 3186 | vCH                     |
| 3126      | 3183 | 3128  | 3183 | vCH                     |
| 3117      | 3164 | 3117  | 3164 | vCH                     |
| 3111      | 3160 | 3113  | 3160 | vCH                     |
| 3105      | 3102 | 3103  | 3102 | vCH                     |
| 1654/1637 | 1696 | 1633  | 1684 | vC=N                    |
| 1518/1509 | 1517 | 1518  | 1516 | vCN(ring)               |
| 1423      | 1441 | 1507  | 1477 | δOH                     |
| 1417      | 1418 | 1419  | 1416 | vCC(ring)               |
| 1384      | 1384 | 1386  | 1391 | vCC(ring)               |
| 1318      | 1321 | 1327  | 1327 | vbreathing ring         |
| 1269      | 1289 | 1266  | 1284 | δCH                     |
| 1245      | 1244 | 1249  | 1243 | vCN                     |
| 1227      | 1227 | 1228  | 1227 | vCN                     |

|           |      |           |      |                            |
|-----------|------|-----------|------|----------------------------|
| 1213      | 1218 | 1211      | 1207 | $\delta$ CH (ring)         |
| 1200      | 1195 | 1202      | 1198 | $\delta$ CH (ring)         |
| 1125      | 1116 | 1125      | 1117 | $\delta$ CH (ring)         |
| 1098/1085 | 1087 | 1096/1083 | 1086 | $\delta$ CH (ring)         |
| 1055      | 1072 | 1052      | 1073 | $\delta$ CH (ring)         |
| 1045      | 1041 | 1043      | 1041 | $\delta$ CH (ring)         |
| 1015      | 1025 | 1007      | 1023 | $\delta$ CH (ring)         |
| -         | -    | 982       | 977  | $\nu$ CN (ring)            |
| 960       | 962  | 959       | 963  | $\delta$ CH (ring)         |
| 949       | 939  | 945       | 940  | $\nu$ breathing ring       |
| 916       | 921  | 914       | 921  | $\gamma$ CH                |
| 905       | 913  | 905       | 913  | $\delta$ CC (ring)         |
| 862       | 888  | 861       | 864  | $\gamma$ CH (ring)         |
| 853       | 859  | -         | -    | $\delta$ CN                |
| 844       | 844  | 849       | 844  | $\gamma$ CH (ring)         |
| 773/758   | 747  | -         | -    | $\gamma$ OH                |
| 747       | 745  | -         | -    | $\gamma$ OH                |
| 714       | 739  | 742       | 741  | $\gamma$ CH (ring)         |
| -         | -    | 702       | 681  | $\gamma$ OH                |
| 662       | 658  | 659       | 658  | $\gamma$ CN (ring)         |
| N.I.      | -    | 654       | 653  | $\gamma$ CN (ring)         |
| N.I.      | -    | 610       | 609  | $\gamma$ CN (ring)         |
| N.I.      | -    | 603       | 606  | $\gamma$ CN (ring)         |
| N.I.      | -    | 416       | 414  | $\delta$ CC=N              |
| N.I.      | -    | 406       | 406  | $\gamma$ CC=N              |
| N.I.      | -    | 387       | 373  | $\delta$ C=NO              |
| N.I.      | -    | 361       | 366  | $\delta$ CN (ring)         |
| N.I.      | -    | 355       | 352  | $\nu$ breathing CN (rings) |
| N.I.      | -    | 283       | 278  | $\gamma$ CN (ring)         |
| N.I.      | -    | 268       | 276  | $\gamma$ CN (ring)         |
| N.I.      | -    | 258       | 258  | $\gamma$ CN (ring)         |
| N.I.      | -    | 159       | 182  | $\delta$ CC=N              |
| N.I.      | -    | 117       | 114  | $\gamma$ CN (ring)         |
| N.I.      | -    | 92        | 97   | $\gamma$ CN (ring)         |
| N.I.      | -    | 65        | 64   | $\gamma$ CN (ring)         |

Abbreviations:  $\nu$ . elongation;  $\delta$ . in-plane flexion;  $\gamma$ . out-of-plane flexion; N.I. not investigated.

**Table S2.** Experimental and calculated bands (B3LYP/6-311++G(d,p). (scale factor 0.977) from the infrared and Raman spectra of **6a** complex (frequencies in  $\text{cm}^{-1}$ ) with the proposed vibration.

| IR   |      | Raman |      | Approximate description |
|------|------|-------|------|-------------------------|
| Exp  | Calc | Exp   | Calc |                         |
| 1684 | 1680 | 1691  | 1680 | $\nu$ C=N               |
| 1560 | 1602 | 1573  | 1602 | $\nu$ C=O               |
| 1519 | 1522 | 1520  | 1522 | $\nu$ CC(ring)          |
| 1436 | 1436 | 1435  | 1436 | scCH <sub>3</sub>       |
| 1418 | 1417 | 1417  | 1423 | $\nu$ CC(ring)          |
| 1388 | 1389 | 1387  | 1389 | $\delta$ OH             |
|      | 1364 |       | 1364 | rockCH <sub>3</sub>     |

|      |      |      |      |                     |
|------|------|------|------|---------------------|
| 1321 | 1329 | 1338 | 1329 | rockCH <sub>3</sub> |
| -    | -    | 1315 | 1315 | vCN(ring)           |
| 1263 | 1267 | 1278 | 1267 | δOH                 |
| 1245 | 1247 | 1245 | 1247 | δCH                 |
| 1201 | 1211 | 1210 | 1211 | vbreathing ring     |
| 1151 | 1196 | 1149 | 1196 | δCH (ring)          |
| 1118 | 1117 | 1119 | 1117 | vbreathing ring     |
| 1098 | 1098 | 1097 | 1098 | δCH (ring)          |
| 1083 | 1090 | 1083 | 1090 | δCH (ring)          |
| 1045 | 1047 | 1046 | 1047 | δCH (ring)          |
| 993  | 998  | 993  | 998  | γCH <sub>3</sub>    |
| 961  | 962  | 959  | 962  | γCH                 |
| 914  | 916  | 915  | 913  | vbreathing ring     |
| 874  | 864  | 849  | 864  | γCH (ring)          |
| 776  | 753  | 772  | 753  | γCH (ring)          |
| N.I. | -    | 655  | 659  | δOCO                |
| N.I. | -    | 603  | 607  | γOCC                |
| N.I. | -    | 414  | 424  | δCCO                |
| N.I. | -    | 365  | 377  | δC=NO               |
| N.I. | -    | 288  | 299  | vCu-OAc             |
| N.I. | -    | 257  | 259  | γCN (ring)          |
| N.I. | -    | 223  | 241  | γCN (ring)          |
| N.I. | -    | 205  | 215  | γOCC                |
| N.I. | -    | 160  | 166  | δCN                 |
| N.I. | -    | 154  | 154  | vCu-OAc             |
| N.I. | -    | 63   | 70   | γCN (ring)          |

Abbreviations: v. elongation; δ. in-plane flexion; γ. out-of-plane flexion; N.I. not investigated.

**Table S3.** Experimental and calculated bands (B3LYP/6-311++G(d,p). (scale factor 0.977) from the infrared and Raman spectra of **6b** complex (frequencies in cm<sup>-1</sup>) with the proposed vibration.

| IR   |      | Raman |      | Approximate description |
|------|------|-------|------|-------------------------|
| Exp  | Calc | Exp   | Calc |                         |
| 1636 | 1679 | 1637  | 1679 | vCN                     |
| 1519 | 1521 | 1518  | 1527 | vCC (ring)              |
| 1459 | 1430 | 1434  | 1423 | vCN (ring)              |
| 1438 | 1415 | 1428  | 1409 | vCC (ring)              |
| 1407 | 1399 | 1404  | 1399 | δOH                     |
| 1381 | 1387 | 1382  | 1387 | vCN (ring)              |
| 1329 | 1334 | 1337  | 1334 | vbreathing ring         |
| 1321 | 1321 | 1318  | 1321 | vbreathing ring         |
| 1305 | 1318 | 1301  | 1318 | vCN (ring)              |
| 1275 | 1269 | 1274  | 1269 | δOH                     |
| 1244 | 1247 | 1245  | 1247 | δCH                     |
| 1206 | 1231 | 1218  | 1231 | vCN (ring)              |
| 1195 | 1207 | 1193  | 1207 | δCH (ring)              |
| -    | -    | 1136  | 1118 | δCH (ring)              |
| 1110 | 1098 | 1110  | 1098 | δCH (ring)              |
| 1106 | 1093 | 1104  | 1093 | δCH (ring)              |

|           |      |           |      |                     |
|-----------|------|-----------|------|---------------------|
| 1080/1072 | 1067 | 1076/1067 | 1067 | $\delta$ CH (ring)  |
| 1048      | 1051 | 1046      | 1051 | $\delta$ CH (ring)  |
| 1028      | 1038 | 1021      | 1038 | $\delta$ CH (ring)  |
| 1003      | 1013 | 1000      | 1013 | $\nu$ NO            |
| 988       | 952  | 985       | 952  | $\gamma$ CH         |
| 948       | 940  | 945       | 940  | $\delta$ CNN (ring) |
| 920       | 914  | 917       | 914  | $\delta$ CCC (ring) |
| 869       | 861  | 871       | 861  | $\gamma$ CH (ring)  |
| 858       | 856  | 853       | 850  | $\gamma$ CH (ring)  |
| 762       | 749  | 762       | 749  | $\gamma$ CH (ring)  |
| 745       | 736  | 742       | 736  | $\delta$ CC=N       |
| N.I.      | -    | 647       | 648  | $\gamma$ CN (ring)  |
| N.I.      | -    | 635       | 637  | $\gamma$ CN (ring)  |
| N.I.      | -    | 594       | 597  | $\gamma$ CN (ring)  |
| N.I.      | -    | 565       | 482  | $\delta$ OH         |
| N.I.      | -    | 425/407   | 422  | $\gamma$ CCN        |
| N.I.      | -    | 392       | 394  | $\delta$ CC=N       |
| N.I.      | -    | 372       | 384  | $\delta$ C=NO       |
| N.I.      | -    | 325       | 324  | $\nu$ CuCl          |
| N.I.      | -    | 288/275   | 262  | $\gamma$ CN (ring)  |
| N.I.      | -    | 228       | 234  | $\gamma$ CN (ring)  |
| N.I.      | -    | 212       | 210  | $\gamma$ CNO        |
| N.I.      | -    | 187       | 189  | $\gamma$ CN (ring)  |
| N.I.      | -    | 178       | 163  | $\gamma$ CN (ring)  |
| N.I.      | -    | 159       | 160  | $\delta$ CuCl       |
| N.I.      | -    | 114       | 123  | $\delta$ CuCl       |
| N.I.      | -    | 102       | 96   | $\gamma$ CN (ring)  |
| N.I.      | -    | 79        | 81   | $\gamma$ CN (ring)  |
| N.I.      | -    | 61        | 66   | $\gamma$ CN (ring)  |

Abbreviations:  $\nu$ . elongation;  $\delta$ . in-plane flexion;  $\gamma$ . out-of-plane flexion; N.I. not investigated.

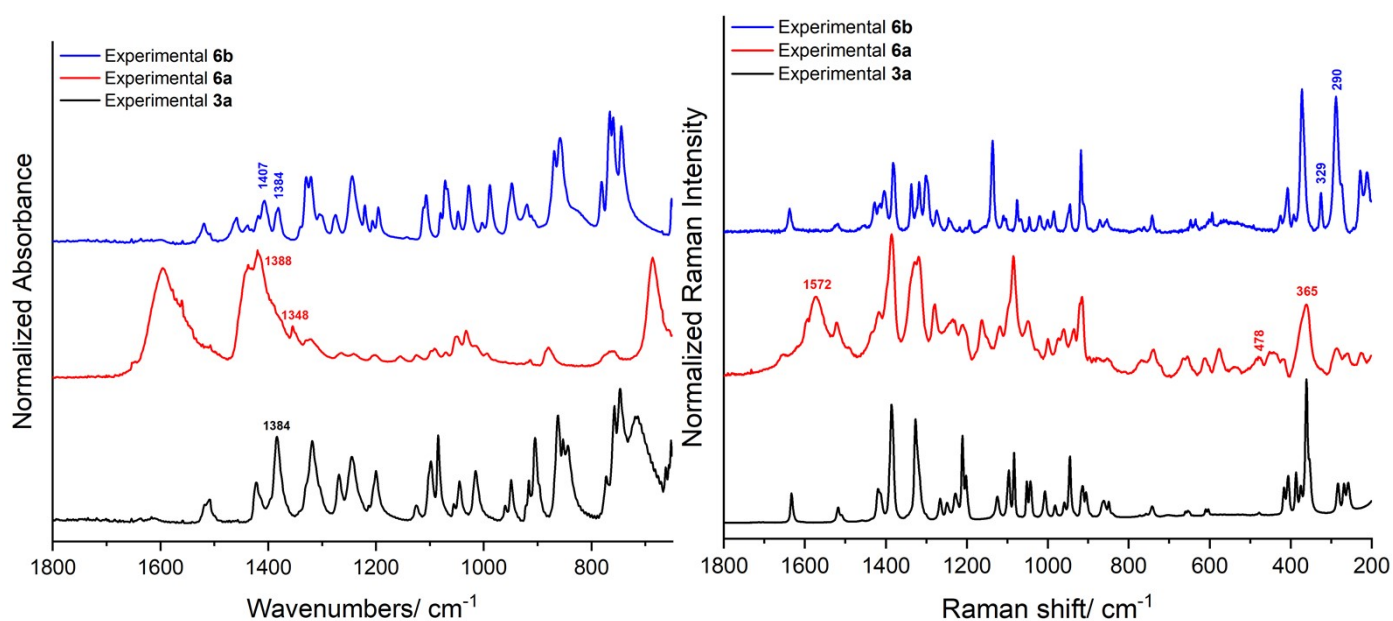

**Figure S19.** Comparison between the IR (left) and Raman (right) experimental spectra of the (*E*)-2,2,2-tris(1*H*-pyrazol-1-yl)acetaldehyde oxime **3a** and the complexes **6a** and **6b**. obtained in solution.



## 5. Characterization of the CuAAC products

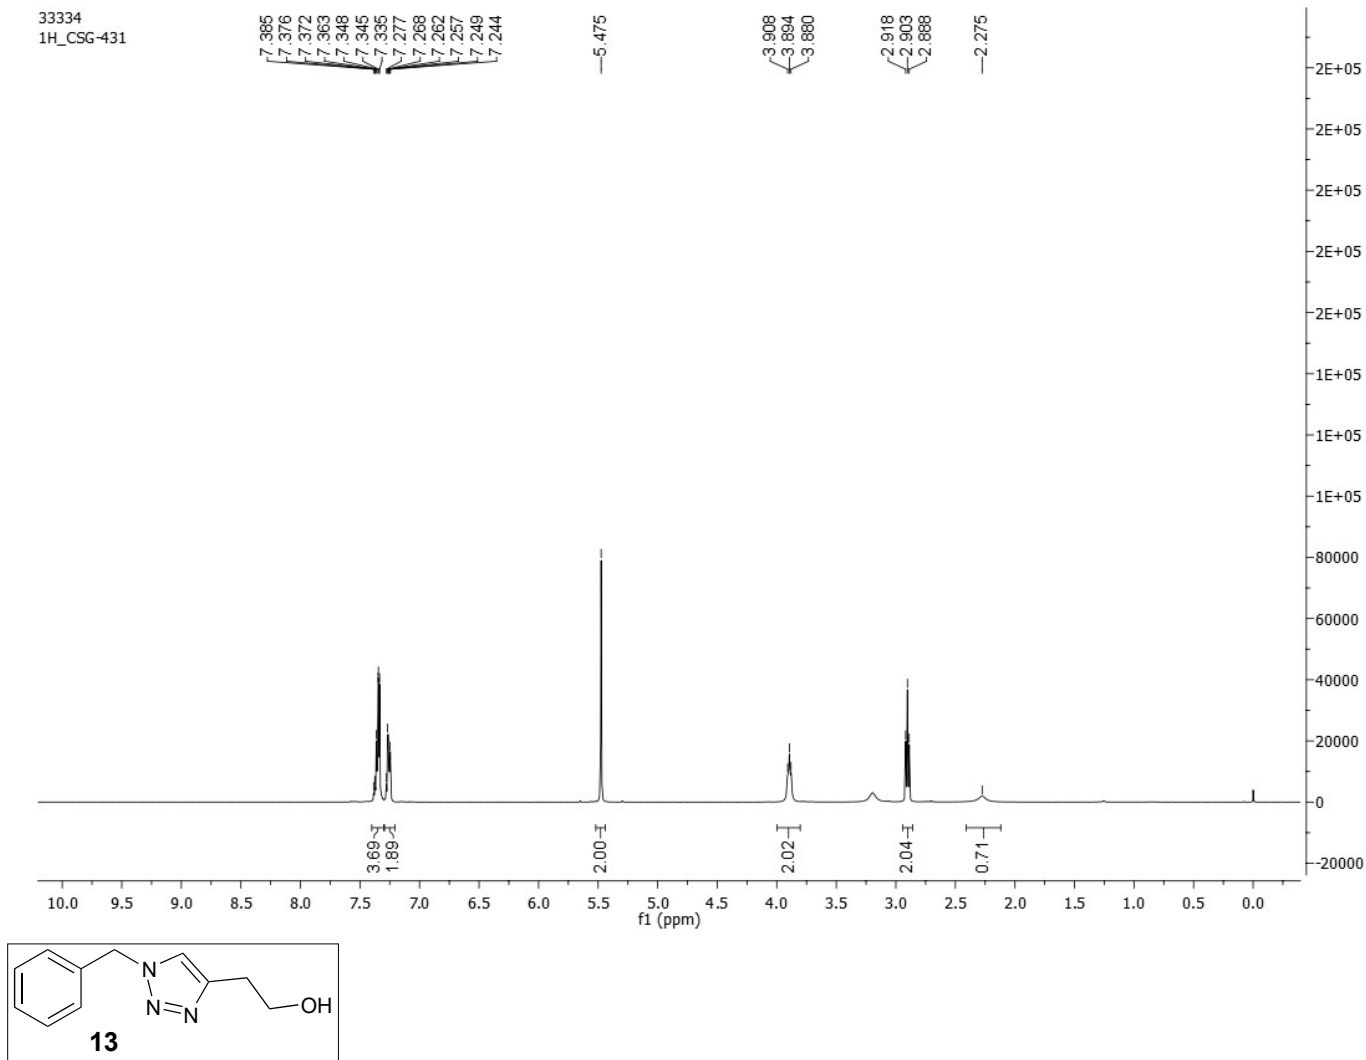

Figure S20.  $^1\text{H-NMR}$  of compound **13** (400 MHz,  $\text{CDCl}_3$ ).

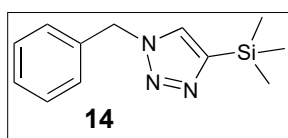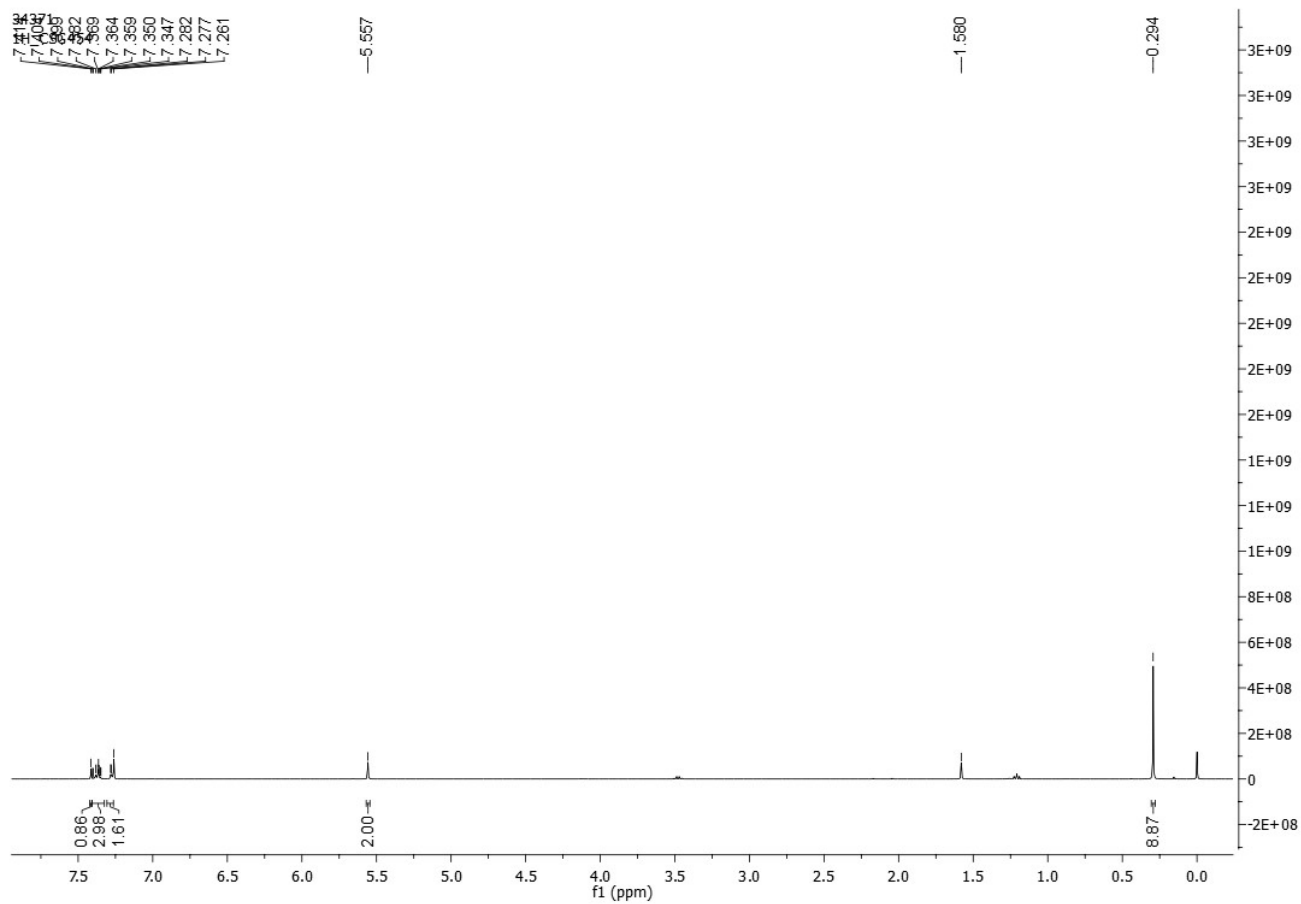

**Figure S21.**  $^1\text{H-NMR}$  of compound **14** (400 MHz,  $\text{CDCl}_3$ ).

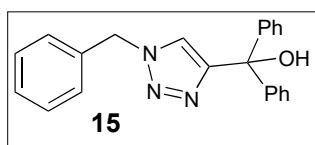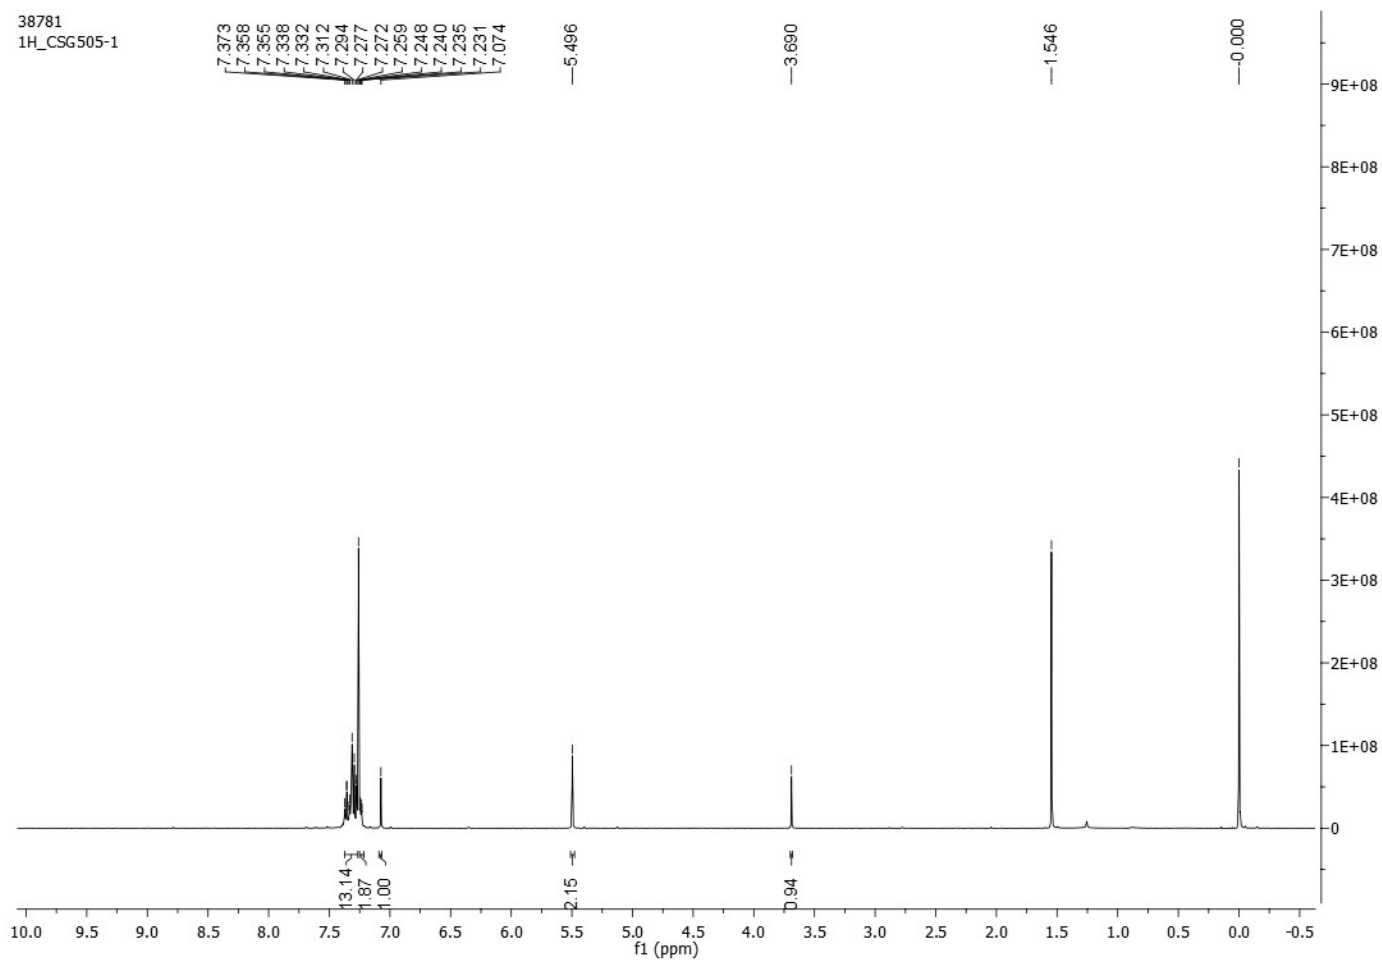

**Figure S22.**  $^1\text{H}$ -NMR of compound **15** (400 MHz,  $\text{CDCl}_3$ ).



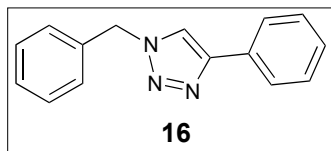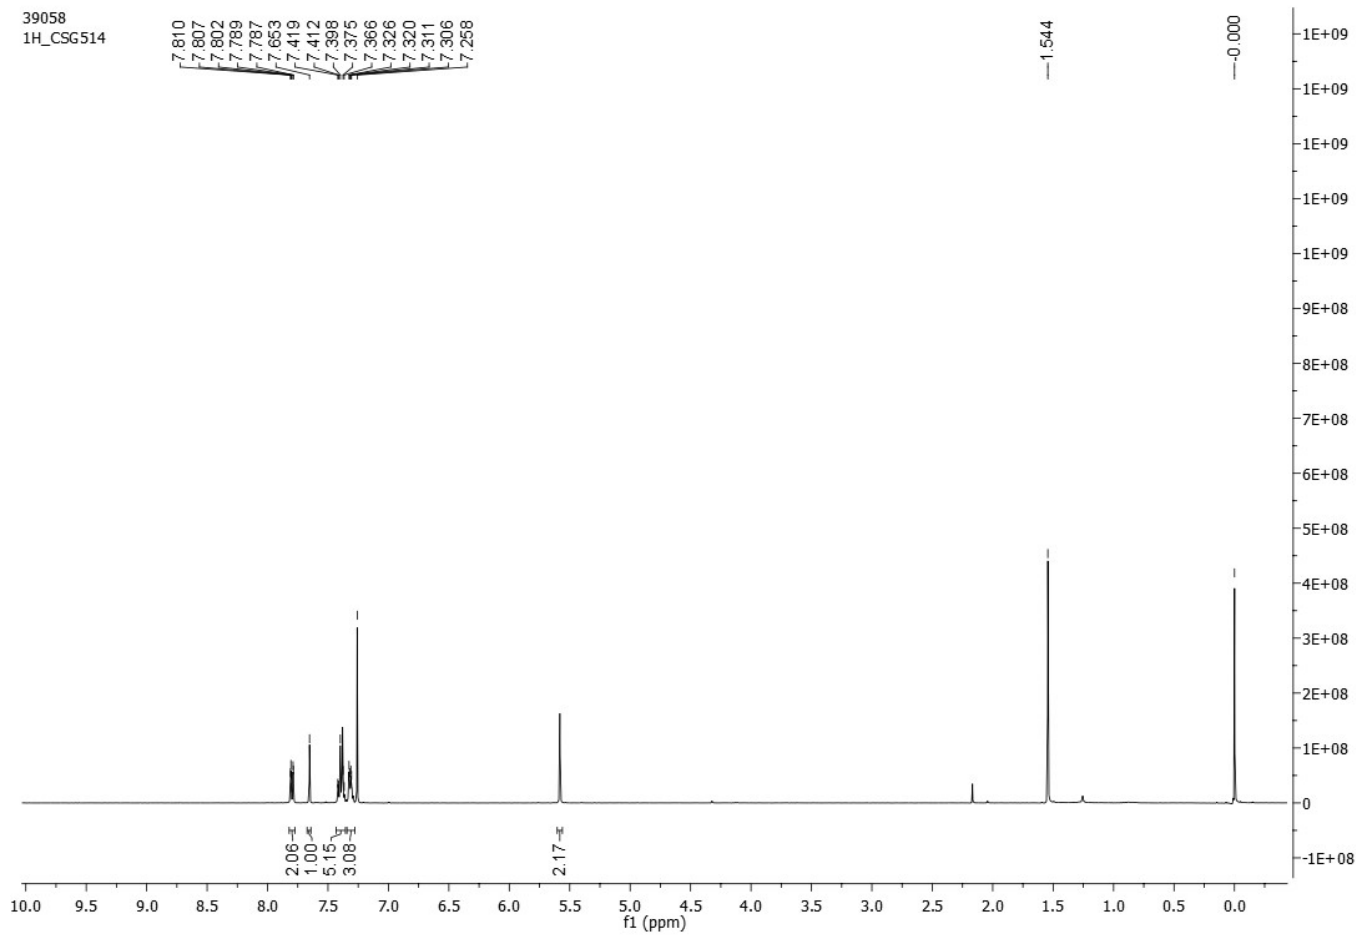

**Figure S23.**  $^1\text{H}$ -NMR of compound **16** (400 MHz,  $\text{CDCl}_3$ ).

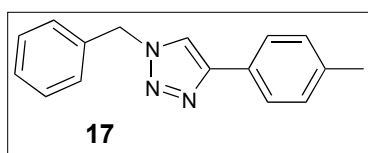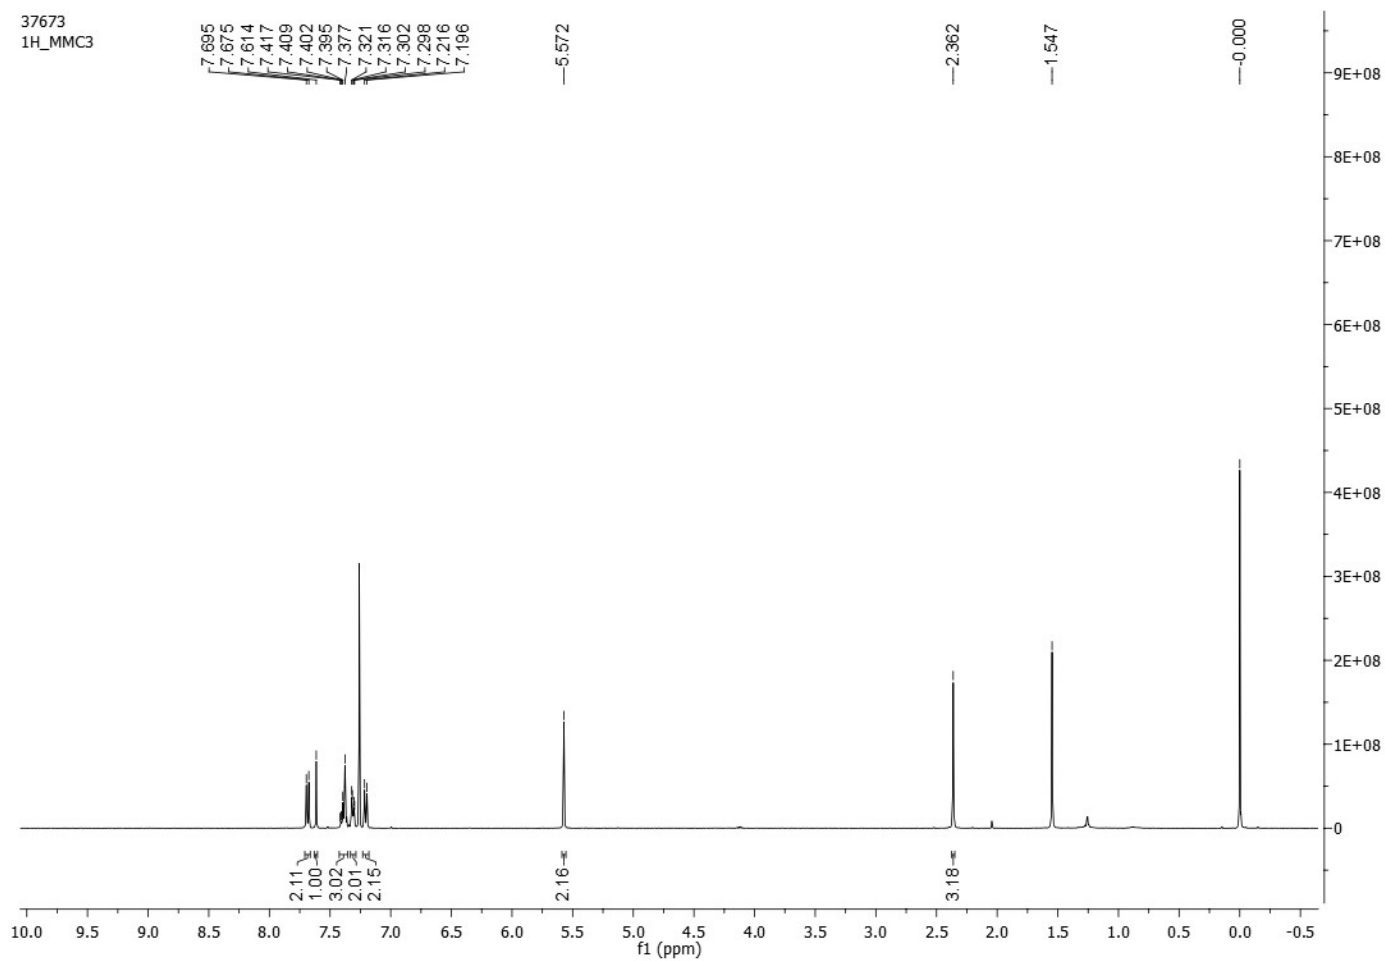

**Figure S24.**  $^1\text{H-NMR}$  of compound **17** (400 MHz,  $\text{CDCl}_3$ ).

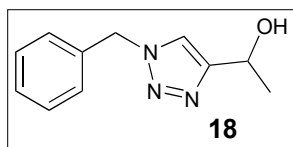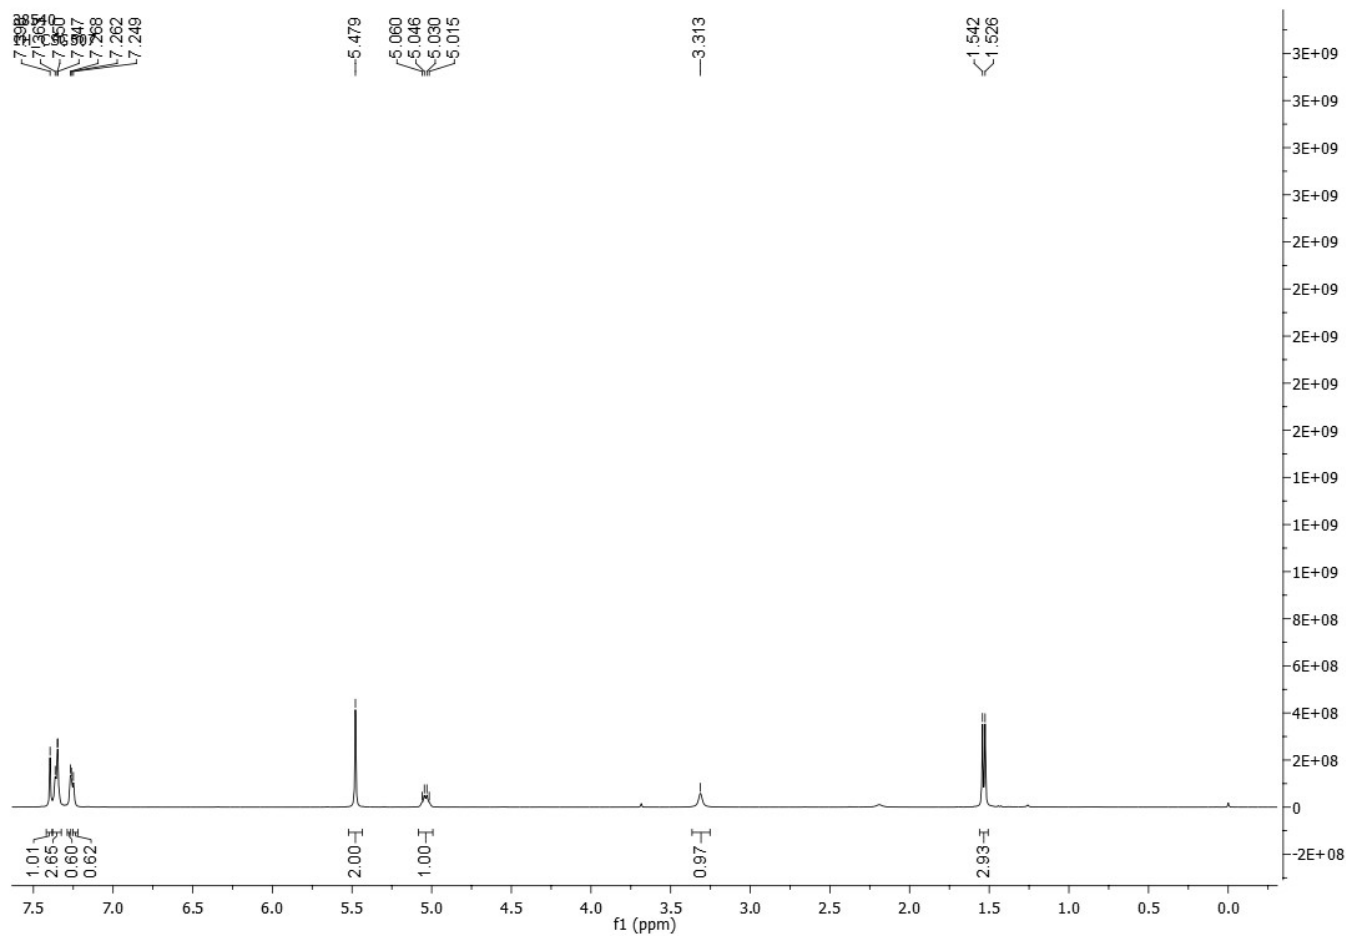

Figure S25.  $^1\text{H}$ -NMR of compound **18** (400 MHz,  $\text{CDCl}_3$ ).

## 6. E-Factor and EcoScale Calculation

**Table S4.** EcoScale Penalty point calculation table

| Parameter                                                                | Penalty points      |
|--------------------------------------------------------------------------|---------------------|
| <b>1 Yield</b>                                                           | $(100 - \%yield)/2$ |
| <b>2 Price of reaction components (to obtain 10 mmol of end product)</b> |                     |
| Inexpensive (< \$10)                                                     | 0                   |
| Expensive (> \$10 and < \$50)                                            | 3                   |
| Very expensive (> \$50)                                                  | 5                   |
| <b>3 Safety<sup>a</sup></b>                                              |                     |
| N (dangerous for environment)                                            | 5                   |
| T (toxic)                                                                | 5                   |
| F (highly flammable)                                                     | 5                   |
| E (explosive)                                                            | 10                  |
| F+ (extremely flammable)                                                 | 10                  |
| T+ (extremely toxic)                                                     | 10                  |
| <b>4 Technical setup</b>                                                 |                     |
| Common setup                                                             | 0                   |
| Instruments for controlled addition of chemicals <sup>b</sup>            | 1                   |
| Unconventional activation technique <sup>c</sup>                         | 2                   |
| Pressure equipment, > 1 atm <sup>d</sup>                                 | 3                   |
| Any additional special glassware                                         | 1                   |
| (Inert) gas atmosphere                                                   | 1                   |
| Glove box                                                                | 3                   |
| <b>5 Temperature/time</b>                                                |                     |
| Room temperature, < 1 h                                                  | 0                   |
| Room temperature, < 24 h                                                 | 1                   |
| Heating, < 1 h                                                           | 2                   |
| Heating, > 1 h                                                           | 3                   |
| Cooling to 0 °C                                                          | 4                   |
| Cooling, < 0 °C                                                          | 5                   |
| <b>6 Workup and purification</b>                                         |                     |
| None                                                                     | 0                   |
| Cooling to room temperature                                              | 0                   |
| Adding solvent                                                           | 0                   |
| Simple filtration                                                        | 0                   |
| Removal of solvent with bp < 150 °C                                      | 0                   |
| Crystallization and filtration                                           | 1                   |
| Removal of solvent with bp > 150 °C                                      | 2                   |
| Solid phase extraction                                                   | 2                   |
| Distillation                                                             | 3                   |
| Sublimation                                                              | 3                   |
| Liquid-liquid extraction <sup>e</sup>                                    | 3                   |
| Classical Chromatography                                                 | 10                  |

<sup>a</sup>Based on the hazard warning symbols. <sup>b</sup>Dropping funnel, syringe pump, gas pressure regulator, etc. <sup>c</sup>Microwave irradiation, ultrasound or photochemical activation, etc. <sup>d</sup>scCO<sub>2</sub>, high pressure hydrogenation equipment, etc. <sup>e</sup>If applicable, the process includes drying of solvent with desiccant and filtration of desiccant.

**Table S5.** Data for the trichloroacetaldehyde oxime synthesized as described by Brintzinger and Titzmann<sup>1</sup>

## SYNTHESIS OF TRICHLORO OXIME

## E-FACTOR

| grams of REACTANTS |        |         |             |     |       |
|--------------------|--------|---------|-------------|-----|-------|
| Compound           | Mw     | density | mol         | mL  | grams |
| Chloral hydrate    | 165,4  |         | 2           |     | 330,8 |
| hydroxylamine      | 69,49  |         | 1           |     | 69,49 |
| CaCl <sub>2</sub>  | 147,01 |         | 1,49649684  |     | 220   |
| water              | 18     |         | 11,11111111 | 200 | 200   |

| grams of PRODUCT |        |             |          |
|------------------|--------|-------------|----------|
| Product          | MW     | mol product | grams    |
| Chloral oxime    | 162,39 | 0,71        | 113,2969 |

E-FACTOR  
6,11458831

## ECOSCALE

| mol to prepare 10 mmol of product | reaction conditions: 1 h 50 °C                                          | Price (SIGMA-ALDRICH 20 sds INFO)                |
|-----------------------------------|-------------------------------------------------------------------------|--------------------------------------------------|
| 0,02816901                        | liquid-liquid extraction                                                | 50G 34,60 euros 10 highly toxic                  |
| 0,01408451                        | evaporation                                                             | 100G 33,10 Euros 10 highly toxic + 5 environment |
| 0,02107742                        | remove the excess of chloral through distillation at 1.250G 26,80 euros | toxic 5                                          |
| 0,15649452                        | Yield 71%                                                               |                                                  |

| DETERMINATION of PRICE of REACTANTS |                         |              |                           |                                    |                       |
|-------------------------------------|-------------------------|--------------|---------------------------|------------------------------------|-----------------------|
| solids                              |                         |              | RESULT                    |                                    |                       |
|                                     | mass bottle (Mm (g/mol) | price (euro) | price (euro/n mmol to pro | Cost to produce 10 mmol pf product |                       |
| Chloral hydrate                     | 50                      | 165,4        | 34,6                      | 0,1144368                          | 0,02816901 0,00322414 |
| Hydroxylamine                       | 100                     | 69,49        | 33,1                      | 0,02300119                         | 0,01408451 0,00032396 |
| CaCl <sub>2</sub>                   | 250                     | 147,01       | 26,8                      | 0,01375947                         | 0,02107742 0,00032117 |

| Liquids |              |         |                         |              |                    |
|---------|--------------|---------|-------------------------|--------------|--------------------|
|         | volume bottl | density | mass bottle (Mm (g/mol) | price (euro) | price (euro/mmole) |
| Water   |              | 18      |                         | 0            | 0                  |

|              | yield | price | Safety | Technical set | Temperature | Workup/Puri | TOTAL |
|--------------|-------|-------|--------|---------------|-------------|-------------|-------|
| penalty poin | 14,5  | 0     | 30     | 0             | 2           | 6           | 52,5  |

ECOSCALE (100-penalty points)  
47,5

**Table S6.** Data for synthesis of compound **3a** (this work) and the previously described by Pinho e Melo<sup>2</sup>.

## SYNTHESIS OF TrisPYRAZOL-1-YL OXIME

## E-FACTOR

| grams of REACTANTS AND SOLVENTS this work |       |         |      |    |         |
|-------------------------------------------|-------|---------|------|----|---------|
| Compound                                  | Mw    | density | mmol | mL | grams   |
| oxime                                     | 162,4 |         | 3,2  |    | 0,51968 |
| pyrazole                                  | 68,1  |         | 10,5 |    | 0,71505 |
| Na <sub>2</sub> CO <sub>3</sub>           | 106   |         | 16   |    | 1,696   |

| grams of REACTANTS AND SOLVENTS Pinho e Melo |       |         |            |    |         |
|----------------------------------------------|-------|---------|------------|----|---------|
| Compound                                     | Mw    | density | mmol       | mL | grams   |
| oxime                                        | 162,4 |         | 3,5        |    | 0,5684  |
| pyrazole                                     | 68,1  |         | 10,5       |    | 0,71505 |
| Na <sub>2</sub> CO <sub>3</sub>              | 106   |         | 17,5       |    | 1,855   |
| DCM                                          | 84,93 | 1,33    | 548,098434 | 35 | 46,55   |

| grams of PRODUCT |       |            |       |           |
|------------------|-------|------------|-------|-----------|
|                  | yield | product Mw | mmol  | grams     |
| this work        | 53    | 257,3      | 1,696 | 0,4363808 |
| Pinho e Melo     | 87    | 257,3      | 2,784 | 0,7163232 |

E-FACTOR  
this work 5,71599209  
Pinho e Melo 68,365965

## ECOSCALE

| mmol to prepare    | Price (SIGMA-ALDRICH 2023) | sds INFO                                  | reaction conditions: 1 h 50 °C  |
|--------------------|----------------------------|-------------------------------------------|---------------------------------|
| 10 mmol of product |                            |                                           | Mechanochemistry (25Hz, 30 min) |
| 18,82352941        |                            |                                           | add ethyl acetate               |
| 61,76470588        | 5G 20,20€                  | Highly toxic 10 + Harmful to aquatic life | filtrate                        |
| 94,11764706        | 500G 42,00€                | Toxic 5                                   | evaporation                     |
|                    |                            |                                           |                                 |
|                    |                            |                                           |                                 |
| 12,57183908        |                            |                                           | 16 h, rt                        |
| 37,71551724        |                            |                                           | filtration                      |
| 62,8591954         |                            |                                           | evaporation                     |
| 1968,744375        | 1L 148,00€                 | Highly toxic 10                           | flash chromatography            |

| DETERMINATION of PRICE of REACTANTS |                         |              |                           |                                    |                       |
|-------------------------------------|-------------------------|--------------|---------------------------|------------------------------------|-----------------------|
| solids                              |                         |              | RESULT                    |                                    |                       |
|                                     | mass bottle (Mm (g/mol) | price (euro) | price (euro/n mmol to pro | Cost to produce 10 mmol pf product |                       |
| oxime                               |                         |              |                           |                                    |                       |
| Pyrazole                            | 5                       | 68,1         | 20,2                      | 0,275124                           | 61,7647059 16,9929529 |
| Na <sub>2</sub> CO <sub>3</sub>     | 500                     | 106          | 42                        | 0,008904                           | 94,1176471 0,83802353 |

| Liquids |              |         |                         |              |                                      |
|---------|--------------|---------|-------------------------|--------------|--------------------------------------|
|         | volume bottl | density | mass bottle (Mm (g/mol) | price (euro) | price (euro/mmole)                   |
| DCM     | 1000         | 1,33    | 1330                    | 84,93        | 148 0,00945086 1968,74438 18,6063218 |

|                | yield            | price | Safety | Technical set | Temperature | Workup/Puri | TOTAL |
|----------------|------------------|-------|--------|---------------|-------------|-------------|-------|
| penalty points | this Work 23,5   | 3     | 20     | 2             | 0           | 0           | 48,5  |
|                | Pinho e Melo 6,5 | 6     | 30     | 0             | 1           | 10          | 53,5  |

ECOSCALE (100-penalty points)  
this Work 51,5  
Pinho e Melo 46,5

**Table S7.** Data for the synthesis of **6b (this work)** and the previously described synthesis of tris(pyrazol-1-yl)methane described by Pettinari<sup>3</sup>

| SYNTHESIS of Cu COMPLEX                               |            |         |            |            |                                                                                                          | E-FACTOR                                   |                      |                                             |                                                                    | ECOSCALE |  |  |  |
|-------------------------------------------------------|------------|---------|------------|------------|----------------------------------------------------------------------------------------------------------|--------------------------------------------|----------------------|---------------------------------------------|--------------------------------------------------------------------|----------|--|--|--|
| <b>grams of REACTANTS AND SOLVENTS this work</b>      |            |         |            |            |                                                                                                          | <b>mmol to prepare</b>                     | <b>Price</b>         | <b>sds INFO</b>                             | <b>reaction conditions:</b>                                        |          |  |  |  |
| Compound                                              | Mw         | density | mmol       | mL         | grams                                                                                                    | 10 mmol of product                         | (SIGMA-ALDRICH 2023) |                                             | 1 h 50 °C                                                          |          |  |  |  |
| pro-ligand                                            | 257,26     |         | 0,1943559  |            | 0,05                                                                                                     | 12,6582278                                 |                      |                                             | Mechanochemistry (25Hz, 30 min)<br>removed with spatula            |          |  |  |  |
| CuCl <sub>2</sub> ·2H <sub>2</sub> O                  | 170,48     |         | 0,1943559  |            | 0,03313379                                                                                               | 12,6582276                                 | 100G 65,70€          | Highly Toxic 10 and Toxic to aquatic life 5 |                                                                    |          |  |  |  |
| <b>grams of REACTANTS AND SOLVENTS Pettinari 2002</b> |            |         |            |            |                                                                                                          |                                            |                      |                                             |                                                                    |          |  |  |  |
| Compound                                              | Mw         | density | mmol       | mL         | grams                                                                                                    |                                            |                      |                                             |                                                                    |          |  |  |  |
| pro-ligand                                            | 214,23     |         | 0,98025407 |            | 0,21                                                                                                     | 45,7219835                                 |                      |                                             | 12 h, rt, nitrogen atm.<br>filtration<br>washed with diethyl ether |          |  |  |  |
| CuCl <sub>2</sub> ·2H <sub>2</sub> O                  | 170,48     |         | 0,49859221 |            | 0,085                                                                                                    | 23,255814                                  | 100G 65,70€          | Highly Toxic 10 and Toxic to aquatic life 5 |                                                                    |          |  |  |  |
| Methanol                                              | 32,04      | 0,792   | 741,573034 | 30         | 23,76                                                                                                    | 34589,1575                                 | 1L 77,90€            | Acute toxicity 10 highly flammable 10       |                                                                    |          |  |  |  |
| <b>grams of PRODUCT</b>                               |            |         |            |            |                                                                                                          | <b>DETERMINATION of PRICE of REACTANTS</b> |                      |                                             |                                                                    |          |  |  |  |
| yield                                                 | product Mw | mmol    | grams      |            |                                                                                                          |                                            |                      |                                             |                                                                    |          |  |  |  |
| this work                                             | 79         | 391,7   | 0,15354116 | 0,06014207 | <b>solids</b>                                                                                            |                                            |                      |                                             |                                                                    |          |  |  |  |
| Pettinari 200                                         | 43         | 348,68  | 0,21439465 | 0,07475513 | <b>RESULT</b>                                                                                            |                                            |                      |                                             |                                                                    |          |  |  |  |
|                                                       |            |         |            |            | mass bottle   Mm (g/mol)   price (euro)   price (euro/r mmol to pro   Cost to produce 10 mmol pf product |                                            |                      |                                             |                                                                    |          |  |  |  |
| <b>E-FACTOR</b>                                       |            |         |            |            |                                                                                                          |                                            |                      |                                             |                                                                    |          |  |  |  |
| this work                                             | 0,3822901  |         |            |            |                                                                                                          |                                            |                      |                                             |                                                                    |          |  |  |  |
| Pettinari 200                                         | 320,783951 |         |            |            |                                                                                                          |                                            |                      |                                             |                                                                    |          |  |  |  |
|                                                       |            |         |            |            | <b>Liquids</b>                                                                                           |                                            |                      |                                             |                                                                    |          |  |  |  |
|                                                       |            |         |            |            | <b>RESULT</b>                                                                                            |                                            |                      |                                             |                                                                    |          |  |  |  |
|                                                       |            |         |            |            | volume bottl density   mass bottle   Mm (g/mol)   price (euro)   price (euro/mmol)                       |                                            |                      |                                             |                                                                    |          |  |  |  |
|                                                       |            |         |            |            | methanol 1000 0,792 792 32,04 77,9 0,00315141 741,573034 2,337                                           |                                            |                      |                                             |                                                                    |          |  |  |  |
|                                                       |            |         |            |            | <b>penalty poin this Work</b>                                                                            |                                            |                      |                                             |                                                                    |          |  |  |  |
|                                                       |            |         |            |            | yield price Safety Technical set Temperature/Workup/Puri TOTAL                                           |                                            |                      |                                             |                                                                    |          |  |  |  |
|                                                       |            |         |            |            | this Work 10,5 0 15 2 0 0 27,5                                                                           |                                            |                      |                                             |                                                                    |          |  |  |  |
|                                                       |            |         |            |            | Pettinari 200 28,5 0 35 1 1 0 65,5                                                                       |                                            |                      |                                             |                                                                    |          |  |  |  |
|                                                       |            |         |            |            | <b>ECOSCALE (100-penalty points)</b>                                                                     |                                            |                      |                                             |                                                                    |          |  |  |  |
|                                                       |            |         |            |            | this Work 72,5                                                                                           |                                            |                      |                                             |                                                                    |          |  |  |  |
|                                                       |            |         |            |            | Pettinari 200 34,5                                                                                       |                                            |                      |                                             |                                                                    |          |  |  |  |

**Table S8.** Data for synthesis of compound **13 (this work)** and as previously described by Martins.<sup>4</sup>

| CuAAC reaction                                      |            |         |            |            |                                                                                                          | E-FACTOR                                   |                      |                                         |                                                                             | ECOSCALE |  |  |  |
|-----------------------------------------------------|------------|---------|------------|------------|----------------------------------------------------------------------------------------------------------|--------------------------------------------|----------------------|-----------------------------------------|-----------------------------------------------------------------------------|----------|--|--|--|
| <b>grams of REACTANTS AND SOLVENTS this work</b>    |            |         |            |            |                                                                                                          | <b>mmol to prepare</b>                     | <b>Price</b>         | <b>sds INFO</b>                         | <b>reaction conditions:</b>                                                 |          |  |  |  |
| Compound                                            | Mw         | density | mmol       | mL         | grams                                                                                                    | 10 mmol of product                         | (SIGMA-ALDRICH 2023) |                                         | 1 h 50 °C                                                                   |          |  |  |  |
| Benzyl bromi                                        | 171,04     |         | 0,436      |            | 0,05                                                                                                     | 11,6350117                                 | 25G 24,30€           | Toxicity 3                              | mech 3h<br>chromatography                                                   |          |  |  |  |
| 3-butinol                                           | 70,09      |         | 0,4796     |            | 0,03361516                                                                                               | 12,8205128                                 | 5G 35,40€            | Toxic 3, flammable 3                    |                                                                             |          |  |  |  |
| Sodium azidi                                        | 65,01      |         | 0,4796     |            | 0,0311788                                                                                                | 12,8205128                                 | 10G 26,30€           | Highly toxic 10, harmful aquatic life 5 |                                                                             |          |  |  |  |
| Catalyst                                            | 391,7      |         | 0,00634    |            | 0,00256172                                                                                               | 0,17482517                                 |                      |                                         |                                                                             |          |  |  |  |
| <b>grams of REACTANTS AND SOLVENTS Martins 2018</b> |            |         |            |            |                                                                                                          |                                            |                      |                                         | <b>MW(125°C, 30 min)</b>                                                    |          |  |  |  |
| Compound                                            | Mw         | density | mmol       | mL         | grams                                                                                                    |                                            |                      |                                         | water added, filtered off, washed with petroleum ether and dried in vacuum. |          |  |  |  |
| Benzyl bromi                                        | 171,04     |         | 0,3        |            | 0,051312                                                                                                 | 12,6582278                                 |                      |                                         |                                                                             |          |  |  |  |
| 3-butinol                                           | 70,09      |         | 0,33       |            | 0,0231297                                                                                                | 13,9240506                                 |                      |                                         |                                                                             |          |  |  |  |
| Sodium azidi                                        | 65,01      |         | 0,33       |            | 0,0214533                                                                                                | 13,9240506                                 |                      |                                         |                                                                             |          |  |  |  |
| Catalyst                                            | 833,94     |         | 0,0045     |            | 0,00375273                                                                                               | 0,18987342                                 |                      |                                         |                                                                             |          |  |  |  |
| H <sub>2</sub> O                                    | 18         |         | 1          |            | 41,6666667                                                                                               | 1758,0872                                  |                      |                                         |                                                                             |          |  |  |  |
| Methanol                                            | 32,04      | 0,792   | 18,5393258 |            | 0,75 0,594                                                                                               | 782,250036                                 | 1L 77,90€            | Acute toxicity 10 highly flammable 10   |                                                                             |          |  |  |  |
| <b>grams of PRODUCT</b>                             |            |         |            |            |                                                                                                          | <b>DETERMINATION of PRICE of REACTANTS</b> |                      |                                         |                                                                             |          |  |  |  |
| yield                                               | product Mw | mmol    | mgms       |            |                                                                                                          |                                            |                      |                                         |                                                                             |          |  |  |  |
| this work                                           | 78         | 203,25  | 0,374088   | 0,07603339 | <b>solids</b>                                                                                            |                                            |                      |                                         |                                                                             |          |  |  |  |
| Pinho e Meic                                        | 79         | 203,25  | 0,237      | 0,04817025 | <b>RESULT</b>                                                                                            |                                            |                      |                                         |                                                                             |          |  |  |  |
|                                                     |            |         |            |            | mass bottle   Mm (g/mol)   price (euro)   price (euro/m mmol to pro   Cost to produce 10 mmol pf product |                                            |                      |                                         |                                                                             |          |  |  |  |
| <b>E-FACTOR</b>                                     |            |         |            |            |                                                                                                          |                                            |                      |                                         |                                                                             |          |  |  |  |
| this work                                           | 0,34347563 |         |            |            |                                                                                                          |                                            |                      |                                         |                                                                             |          |  |  |  |
| Martins 2018                                        | 28,9696956 |         |            |            |                                                                                                          |                                            |                      |                                         |                                                                             |          |  |  |  |
|                                                     |            |         |            |            | <b>Liquids</b>                                                                                           |                                            |                      |                                         |                                                                             |          |  |  |  |
|                                                     |            |         |            |            | <b>RESULT</b>                                                                                            |                                            |                      |                                         |                                                                             |          |  |  |  |
|                                                     |            |         |            |            | volume bottl density   mass bottle   Mm (g/mol)   price (euro)   price (euro/mmol)                       |                                            |                      |                                         |                                                                             |          |  |  |  |
|                                                     |            |         |            |            | Methanol 1000 0,792 792 32,04 77,9 0,003151409 782,250036 2,46318987                                     |                                            |                      |                                         |                                                                             |          |  |  |  |
|                                                     |            |         |            |            | <b>penalty poin this Work</b>                                                                            |                                            |                      |                                         |                                                                             |          |  |  |  |
|                                                     |            |         |            |            | yield price Safety Technical set Temperature/Workup/Puri TOTAL                                           |                                            |                      |                                         |                                                                             |          |  |  |  |
|                                                     |            |         |            |            | this Work 11 0 30 2 1 10 54                                                                              |                                            |                      |                                         |                                                                             |          |  |  |  |
|                                                     |            |         |            |            | Martins 201 10,5 0 30 2 2 0 64,3                                                                         |                                            |                      |                                         |                                                                             |          |  |  |  |
|                                                     |            |         |            |            | <b>ECOSCALE (100-penalty points)</b>                                                                     |                                            |                      |                                         |                                                                             |          |  |  |  |
|                                                     |            |         |            |            | this Work 46                                                                                             |                                            |                      |                                         |                                                                             |          |  |  |  |
|                                                     |            |         |            |            | Pinho e Meic 35,3                                                                                        |                                            |                      |                                         |                                                                             |          |  |  |  |

## 7. XRD supplementary material

**Table S9.** CRYSTAL DATA AND DETAILS OF THE STRUCTURE DETERMINATION  
FOR: CSG503B\_A P 21/N R = 0.04

### CRYSTAL DATA

|                          |                                 |
|--------------------------|---------------------------------|
| FORMULA                  | C11 H11 N7 O                    |
| FORMULA WEIGHT           | 257.27                          |
| CRYSTAL SYSTEM           | MONOCLINIC                      |
| SPACE GROUP              | P21/N (NO. 14)                  |
| A. B. C [ANGSTROM]       | 10.2989(3) 9.5354(3) 12.3745(4) |
| ALPHA. BETA. GAMMA [DEG] | 90 91.395(2) 90                 |
| V [ANG**3]               | 1214.87(7)                      |
| Z                        | 4                               |
| D(CALC) [G/CM**3]        | 1.407                           |
| MU(MOKA) [ /MM ]         | 0.100                           |
| F(000)                   | 536                             |
| CRYSTAL SIZE [MM]        | 0.16 X 0.18 X 0.25              |

### DATA COLLECTION

|                                  |                             |
|----------------------------------|-----------------------------|
| TEMPERATURE (K)                  | 293                         |
| RADIATION [ANGSTROM]             | MOKA 0.71073                |
| THETA MIN-MAX [DEG]              | 3.4. 27.5                   |
| DATASET                          | -13: 13 ; -12: 12 ; -16: 16 |
| TOT.. UNIQ. DATA. R(INT)         | 114886. 2792. 0.047         |
| OBSERVED DATA [I > 2.0 SIGMA(I)] | 2285                        |

### REFINEMENT

|                                                                               |                      |
|-------------------------------------------------------------------------------|----------------------|
| NREF. NPAR                                                                    | 2792. 175            |
| R. WR2. S                                                                     | 0.0353. 0.0975. 1.03 |
| W = $\sqrt{2^2(FO^2)^2 + (0.0422P)^2 + 0.3590P}$ WHERE $P = (FO^2 + 2FC^2)/3$ |                      |
| MAX. AND AV. SHIFT/ERROR                                                      | 0.00. 0.00           |
| MIN. AND MAX. RESD. DENS. [E/ANG^3]                                           | -0.18. 0.20          |

**Table S10.** FINAL COORDINATES AND EQUIVALENT ISOTROPIC DISPLACEMENT  
PARAMETERS OF THE NON-HYDROGEN ATOMS  
FOR: CSG503B\_A P 21/N R = 0.04

| ATOM | X           | Y            | Z           | U(EQ) [ANG^2] |
|------|-------------|--------------|-------------|---------------|
| ---- | ---         | ---          | ---         | -----         |
| O1   | 0.54282(10) | 0.59101(10)  | 0.37986(8)  | 0.0442(3)     |
| N1   | 0.48687(11) | 0.45835(12)  | 0.38222(8)  | 0.0399(3)     |
| N2   | 0.36140(10) | 0.24657(11)  | 0.16577(8)  | 0.0333(3)     |
| N3   | 0.29901(12) | 0.35381(13)  | 0.11518(9)  | 0.0472(4)     |
| N4   | 0.50228(9)  | 0.15852(11)  | 0.30132(8)  | 0.0331(3)     |
| N5   | 0.62023(10) | 0.17497(13)  | 0.25636(8)  | 0.0416(3)     |
| N6   | 0.29495(10) | 0.24362(11)  | 0.34647(8)  | 0.0346(3)     |
| N7   | 0.31050(12) | 0.25073(15)  | 0.45530(9)  | 0.0518(4)     |
| C1   | 0.40572(11) | 0.26521(13)  | 0.27736(9)  | 0.0304(3)     |
| C2   | 0.46467(12) | 0.41014(13)  | 0.28988(9)  | 0.0345(3)     |
| C3   | 0.25410(15) | 0.2973(2)    | 0.02448(11) | 0.0554(5)     |
| C4   | 0.28510(15) | 0.1570(2)    | 0.01622(11) | 0.0554(5)     |
| C5   | 0.35341(14) | 0.12596(16)  | 0.10844(11) | 0.0446(4)     |
| C6   | 0.67504(15) | 0.05020(18)  | 0.26689(12) | 0.0522(5)     |
| C7   | 0.59441(17) | -0.04567(18) | 0.31614(14) | 0.0587(5)     |
| C8   | 0.48364(15) | 0.02565(16)  | 0.33627(12) | 0.0489(5)     |
| C9   | 0.19168(15) | 0.23615(17)  | 0.49122(12) | 0.0528(5)     |
| C10  | 0.10096(14) | 0.22088(17)  | 0.40808(13) | 0.0518(5)     |
| C11  | 0.16907(12) | 0.22661(15)  | 0.31600(11) | 0.0411(4)     |

U(EQ) = 1/3 OF THE TRACE OF THE ORTHOGONALIZED U TENSOR



**Table S11.** HYDROGEN ATOM POSITIONS AND ISOTROPIC DISPLACEMENT  
 PARAMETERS  
 FOR: CSG503B\_A P 21/N R = 0.04

| ATOM | X          | Y          | Z          | U(ISO) [ANG^2] |
|------|------------|------------|------------|----------------|
| H1   | 0.5577(17) | 0.6139(19) | 0.4548(15) | 0.0660         |
| H2   | 0.48416    | 0.46279    | 0.22912    | 0.0410         |
| H3   | 0.20681    | 0.34655    | -0.02806   | 0.0660         |
| H4   | 0.26377    | 0.09650    | -0.04044   | 0.0670         |
| H5   | 0.38777    | 0.03922    | 0.12820    | 0.0530         |
| H6   | 0.75812    | 0.02917    | 0.24391    | 0.0630         |
| H7   | 0.61243    | -0.13910   | 0.33201    | 0.0700         |
| H8   | 0.40948    | -0.00975   | 0.36788    | 0.0590         |
| H9   | 0.17141    | 0.23616    | 0.56404    | 0.0630         |
| H10  | 0.01178    | 0.20913    | 0.41408    | 0.0620         |
| H11  | 0.13577    | 0.22013    | 0.24564    | 0.0490         |

=====

THE TEMPERATURE FACTOR HAS THE FORM OF EXP(-T) WHERE  
 $T = 8 * (\pi^2) * U * (\sin(\theta) / \lambda)^2$  FOR ISOTROPIC ATOMS

**Table S12. (AN)ISOTROPIC DISPLACEMENT PARAMETERS  
FOR: CSG503B\_A P 21/N R = 0.04**

| ATOM | U(1.1) OR U | U(2.2)     | U(3.3)     | U(2.3)     | U(1.3)     | U(1.2)     |
|------|-------------|------------|------------|------------|------------|------------|
| O1   | 0.0537(6)   | 0.0402(5)  | 0.0385(5)  | -0.0042(4) | -0.0044(4) | -0.0140(4) |
| N1   | 0.0480(6)   | 0.0366(6)  | 0.0348(5)  | -0.0020(4) | -0.0034(4) | -0.0073(5) |
| N2   | 0.0351(5)   | 0.0400(6)  | 0.0246(5)  | -0.0020(4) | -0.0041(4) | -0.0012(4) |
| N3   | 0.0557(7)   | 0.0528(7)  | 0.0325(5)  | 0.0045(5)  | -0.0089(5) | 0.0093(6)  |
| N4   | 0.0316(5)   | 0.0392(6)  | 0.0285(5)  | 0.0029(4)  | -0.0014(4) | -0.0010(4) |
| N5   | 0.0340(5)   | 0.0584(7)  | 0.0325(5)  | 0.0024(5)  | 0.0037(4)  | 0.0036(5)  |
| N6   | 0.0315(5)   | 0.0453(6)  | 0.0271(5)  | -0.0040(4) | 0.0006(4)  | -0.0058(4) |
| N7   | 0.0475(7)   | 0.0808(9)  | 0.0273(5)  | -0.0059(5) | 0.0044(5)  | -0.0191(6) |
| C1   | 0.0298(5)   | 0.0383(6)  | 0.0231(5)  | -0.0011(4) | -0.0018(4) | -0.0025(5) |
| C2   | 0.0364(6)   | 0.0399(7)  | 0.0270(5)  | 0.0005(5)  | -0.0010(4) | -0.0048(5) |
| C3   | 0.0520(8)   | 0.0839(12) | 0.0297(7)  | 0.0027(7)  | -0.0110(6) | 0.0053(8)  |
| C4   | 0.0524(8)   | 0.0803(11) | 0.0331(7)  | -0.0165(7) | -0.0061(6) | -0.0111(8) |
| C5   | 0.0497(7)   | 0.0479(8)  | 0.0360(7)  | -0.0109(6) | -0.0016(5) | -0.0044(6) |
| C6   | 0.0464(8)   | 0.0663(10) | 0.0436(7)  | -0.0077(7) | -0.0053(6) | 0.0183(7)  |
| C7   | 0.0648(10)  | 0.0452(8)  | 0.0652(10) | 0.0005(7)  | -0.0179(8) | 0.0112(7)  |
| C8   | 0.0502(8)   | 0.0436(8)  | 0.0523(8)  | 0.0114(6)  | -0.0085(6) | -0.0079(6) |
| C9   | 0.0548(8)   | 0.0640(10) | 0.0405(7)  | -0.0089(7) | 0.0171(6)  | -0.0131(7) |
| C10  | 0.0358(7)   | 0.0585(9)  | 0.0615(9)  | -0.0056(7) | 0.0125(6)  | -0.0024(6) |
| C11  | 0.0316(6)   | 0.0478(8)  | 0.0437(7)  | -0.0030(6) | -0.0018(5) | -0.0013(5) |

=====

THE TEMPERATURE FACTOR HAS THE FORM OF  $\exp(-T)$  WHERE  
 $T = 8 * (\pi^2) * U * (\sin(\theta) / \lambda)^2$  FOR ISOTROPIC ATOMS  
 $T = 2 * (\pi^2) * \sum_{IJ} (H(I) * H(J) * U(I,J) * \text{ASTAR}(I) * \text{ASTAR}(J))$ . FOR  
ANISOTROPIC ATOMS.  $\text{ASTAR}(I)$  ARE RECIPROCAL AXIAL LENGTHS AND  
 $H(I)$  ARE THE REFLECTION INDICES.

**Table S13.** BOND DISTANCES (ANGSTROM)  
FOR: CSG503B\_A P 21/N R = 0.04

|    |      |            |     |      |          |
|----|------|------------|-----|------|----------|
| O1 | -N1  | 1.3906(15) | C3  | -C4  | 1.380(3) |
| N1 | -C2  | 1.2476(15) | C4  | -C5  | 1.359(2) |
| O1 | -H1  | 0.961(19)  | C6  | -C7  | 1.386(2) |
| N2 | -N3  | 1.3531(16) | C7  | -C8  | 1.356(2) |
| N2 | -C5  | 1.3527(18) | C9  | -C10 | 1.381(2) |
| N2 | -C1  | 1.4547(15) | C10 | -C11 | 1.354(2) |
| N3 | -C3  | 1.3186(19) | C2  | -H2  | 0.9300   |
| N4 | -C1  | 1.4483(15) | C3  | -H3  | 0.9300   |
| N4 | -C8  | 1.3539(18) | C4  | -H4  | 0.9300   |
| N4 | -N5  | 1.3575(14) | C5  | -H5  | 0.9300   |
| N5 | -C6  | 1.322(2)   | C6  | -H6  | 0.9300   |
| N6 | -N7  | 1.3540(15) | C7  | -H7  | 0.9300   |
| N6 | -C11 | 1.3511(16) | C8  | -H8  | 0.9300   |
| N6 | -C1  | 1.4570(15) | C9  | -H9  | 0.9300   |
| N7 | -C9  | 1.319(2)   | C10 | -H10 | 0.9300   |
| C1 | -C2  | 1.5159(17) | C11 | -H11 | 0.9300   |

**Table S14. BOND ANGLES (DEGREES)**  
 FOR: CSG503B\_A P 21/N R = 0.04

|    |     |      |            |     |      |      |            |
|----|-----|------|------------|-----|------|------|------------|
| O1 | -N1 | -C2  | 112.50(10) | C6  | -C7  | -C8  | 105.40(15) |
| N1 | -O1 | -H1  | 104.0(11)  | N4  | -C8  | -C7  | 106.50(13) |
| N3 | -N2 | -C5  | 112.19(10) | N7  | -C9  | -C10 | 112.12(13) |
| C1 | -N2 | -C5  | 127.98(11) | C9  | -C10 | -C11 | 105.54(13) |
| N3 | -N2 | -C1  | 118.77(10) | N6  | -C11 | -C10 | 106.46(12) |
| N2 | -N3 | -C3  | 103.75(12) | N1  | -C2  | -H2  | 120.00     |
| N5 | -N4 | -C1  | 116.86(10) | C1  | -C2  | -H2  | 120.00     |
| N5 | -N4 | -C8  | 111.98(11) | N3  | -C3  | -H3  | 124.00     |
| C1 | -N4 | -C8  | 128.37(11) | C4  | -C3  | -H3  | 124.00     |
| N4 | -N5 | -C6  | 103.88(11) | C3  | -C4  | -H4  | 127.00     |
| N7 | -N6 | -C1  | 120.09(10) | C5  | -C4  | -H4  | 127.00     |
| N7 | -N6 | -C11 | 111.90(11) | N2  | -C5  | -H5  | 127.00     |
| C1 | -N6 | -C11 | 127.80(10) | C4  | -C5  | -H5  | 127.00     |
| N6 | -N7 | -C9  | 103.98(11) | N5  | -C6  | -H6  | 124.00     |
| N2 | -C1 | -N4  | 107.85(9)  | C7  | -C6  | -H6  | 124.00     |
| N2 | -C1 | -C2  | 108.91(9)  | C6  | -C7  | -H7  | 127.00     |
| N4 | -C1 | -N6  | 108.91(9)  | C8  | -C7  | -H7  | 127.00     |
| N4 | -C1 | -C2  | 110.38(9)  | N4  | -C8  | -H8  | 127.00     |
| N6 | -C1 | -C2  | 112.72(10) | C7  | -C8  | -H8  | 127.00     |
| N2 | -C1 | -N6  | 107.93(9)  | N7  | -C9  | -H9  | 124.00     |
| N1 | -C2 | -C1  | 119.57(11) | C10 | -C9  | -H9  | 124.00     |
| N3 | -C3 | -C4  | 112.48(14) | C9  | -C10 | -H10 | 127.00     |
| C3 | -C4 | -C5  | 105.37(14) | C11 | -C10 | -H10 | 127.00     |
| N2 | -C5 | -C4  | 106.20(14) | N6  | -C11 | -H11 | 127.00     |
| N5 | -C6 | -C7  | 112.21(14) | C10 | -C11 | -H11 | 127.00     |

**Table S15. TORSION ANGLES (DEGREES)**  
 FOR: CSG503B\_A P 21/N R = 0.04

|     |     |     |     |             |
|-----|-----|-----|-----|-------------|
| O1  | -N1 | -C2 | -C1 | 178.99(10)  |
| C1  | -N2 | -N3 | -C3 | -170.19(11) |
| C5  | -N2 | -N3 | -C3 | -0.99(15)   |
| N3  | -N2 | -C1 | -N4 | -162.11(10) |
| N3  | -N2 | -C1 | -N6 | 80.36(13)   |
| N3  | -N2 | -C1 | -C2 | -42.32(14)  |
| C5  | -N2 | -C1 | -N4 | 30.60(16)   |
| C5  | -N2 | -C1 | -N6 | -86.92(15)  |
| C5  | -N2 | -C1 | -C2 | 150.40(12)  |
| N3  | -N2 | -C5 | -C4 | 1.09(16)    |
| C1  | -N2 | -C5 | -C4 | 169.07(12)  |
| N2  | -N3 | -C3 | -C4 | 0.51(16)    |
| C1  | -N4 | -N5 | -C6 | -164.22(11) |
| C8  | -N4 | -N5 | -C6 | -1.53(14)   |
| N5  | -N4 | -C1 | -N2 | 72.87(12)   |
| N5  | -N4 | -C1 | -N6 | -170.25(9)  |
| N5  | -N4 | -C1 | -C2 | -46.00(13)  |
| C8  | -N4 | -C1 | -N2 | -86.54(15)  |
| C8  | -N4 | -C1 | -N6 | 30.35(16)   |
| C8  | -N4 | -C1 | -C2 | 154.59(12)  |
| N5  | -N4 | -C8 | -C7 | 1.71(16)    |
| C1  | -N4 | -C8 | -C7 | 161.93(13)  |
| N4  | -N5 | -C6 | -C7 | 0.76(16)    |
| C1  | -N6 | -N7 | -C9 | 175.86(12)  |
| C11 | -N6 | -N7 | -C9 | 0.68(16)    |
| N7  | -N6 | -C1 | -N2 | 177.98(11)  |
| N7  | -N6 | -C1 | -N4 | 61.15(14)   |
| N7  | -N6 | -C1 | -C2 | -61.70(15)  |

**Table S16.** TORSION ANGLES (DEGREES) (CONTINUED)

FOR: CSG503B\_A P 21/N R = 0.04

|     |      |      |      |             |
|-----|------|------|------|-------------|
| C11 | -N6  | -C1  | -N2  | -7.68(17)   |
| C11 | -N6  | -C1  | -N4  | -124.52(13) |
| C11 | -N6  | -C1  | -C2  | 112.63(14)  |
| N7  | -N6  | -C11 | -C10 | -0.71(16)   |
| C1  | -N6  | -C11 | -C10 | -175.43(12) |
| N6  | -N7  | -C9  | -C10 | -0.39(18)   |
| N2  | -C1  | -C2  | -N1  | 166.71(11)  |
| N4  | -C1  | -C2  | -N1  | -75.07(14)  |
| N6  | -C1  | -C2  | -N1  | 46.97(15)   |
| N3  | -C3  | -C4  | -C5  | 0.13(18)    |
| C3  | -C4  | -C5  | -N2  | -0.71(16)   |
| N5  | -C6  | -C7  | -C8  | 0.24(19)    |
| C6  | -C7  | -C8  | -N4  | -1.14(17)   |
| N7  | -C9  | -C10 | -C11 | 0.0(2)      |
| C9  | -C10 | -C11 | -N6  | 0.43(17)    |

**Table S17.** CONTACT DISTANCES(ANGSTROM)  
 FOR: CSG503B\_A P 21/N R = 0.04

|    |        |            |    |        |            |
|----|--------|------------|----|--------|------------|
| O1 | .N1_D  | 3.0045(14) | N6 | .N1    | 2.8727(15) |
| O1 | .N7_D  | 2.9275(16) | N6 | .N3    | 3.0501(15) |
| O1 | .H2    | 2.3000     | N6 | .C10   | 2.1666(18) |
| O1 | .H11_C | 2.6800     | N6 | .C5    | 3.2224(17) |
| O1 | .H7_A  | 2.7400     | N6 | .C8    | 2.8503(19) |
| O1 | .H6_B  | 2.6600     | N7 | .N4    | 2.9134(15) |
| N1 | .N4    | 3.0346(15) | N7 | .C2    | 3.0299(17) |
| N1 | .N6    | 2.8727(15) | N7 | .C8    | 3.175(2)   |
| N1 | .N7    | 2.8490(17) | N7 | .C10   | 2.2401(19) |
| N1 | .O1_D  | 3.0045(14) | N7 | .N1    | 2.8490(17) |
| N1 | .N1_D  | 3.0270(14) | N7 | .O1_D  | 2.9275(16) |
| N2 | .C8    | 3.2163(18) | C1 | .C3    | 3.4765(18) |
| N2 | .N5    | 2.9467(15) | C1 | .C7    | 3.571(2)   |
| N2 | .C4    | 2.1682(18) | C1 | .C4    | 3.5854(18) |
| N2 | .C11   | 2.7559(16) | N1 | .H1_D  | 2.190(18)  |
| N3 | .N6    | 3.0501(15) | C1 | .C10   | 3.5908(19) |
| N3 | .C2    | 2.7737(16) | C1 | .C9    | 3.4962(19) |
| N3 | .C8_C  | 3.407(2)   | C1 | .C6    | 3.454(2)   |
| N3 | .C11   | 3.0983(18) | C2 | .N3    | 2.7737(16) |
| N3 | .C4    | 2.244(2)   | C2 | .C11   | 3.5331(18) |
| N4 | .C7    | 2.172(2)   | C2 | .C11_C | 3.5542(19) |
| N4 | .N1    | 3.0346(15) | C2 | .N7    | 3.0299(17) |
| N4 | .C5    | 2.8224(17) | N2 | .H2    | 2.5300     |
| N4 | .N7    | 2.9134(15) | N2 | .H11   | 2.5600     |
| N5 | .C2    | 2.7928(17) | C2 | .N5    | 2.7928(17) |
| N5 | .C5    | 3.2978(18) | C3 | .C1    | 3.4765(18) |
| N5 | .C7    | 2.248(2)   | N3 | .H11   | 2.6800     |
| N5 | .N2    | 2.9467(15) | C3 | .C6_H  | 3.579(2)   |

**Table S18.** CONTACT DISTANCES(ANGSTROM) (CONTINUED)

FOR: CSG503B\_A P 21/N R = 0.04

|    |       |            |     |        |            |
|----|-------|------------|-----|--------|------------|
| N3 | .H2   | 2.5600     | C8  | .N6    | 2.8503(19) |
| N3 | .H8_C | 2.5200     | C8  | .N7    | 3.175(2)   |
| C3 | .C5   | 2.178(2)   | C9  | .C11   | 2.177(2)   |
| N4 | .H5   | 2.6700     | C9  | .C1    | 3.4962(19) |
| C4 | .N2   | 2.1682(18) | C10 | .C1    | 3.5908(19) |
| C4 | .C1   | 3.5854(18) | C10 | .N6    | 2.1666(18) |
| N4 | .H3_E | 2.9500     | C11 | .C5    | 3.3704(19) |
| N5 | .H3_E | 2.8000     | C11 | .C9    | 2.177(2)   |
| N5 | .H9_F | 2.5900     | C11 | .C2    | 3.5331(18) |
| C5 | .C3   | 2.178(2)   | C11 | .N3    | 3.0983(18) |
| C5 | .C8   | 3.237(2)   | C11 | .C2_I  | 3.5542(19) |
| C5 | .N4   | 2.8224(17) | C11 | .N2    | 2.7559(16) |
| C5 | .N5   | 3.2978(18) | C1  | .H8    | 2.8500     |
| C5 | .C11  | 3.3704(19) | C1  | .H11   | 2.8300     |
| C5 | .N6   | 3.2224(17) | C1  | .H5    | 2.8400     |
| C6 | .C1   | 3.454(2)   | C2  | .H1    | 2.960(18)  |
| N6 | .H8   | 2.7000     | C3  | .H8_C  | 2.8500     |
| C6 | .C3_E | 3.579(2)   | C3  | .H5    | 3.0800     |
| C6 | .C8   | 2.182(2)   | C3  | .H10_F | 3.0100     |
| C7 | .C1   | 3.571(2)   | C4  | .H10_F | 2.9700     |
| N7 | .H7_G | 2.9300     | C5  | .H3    | 3.0700     |
| C7 | .N4   | 2.172(2)   | C5  | .H11   | 2.9800     |
| N7 | .H1_D | 2.162(18)  | C6  | .H3_E  | 2.7300     |
| N7 | .H8   | 2.9000     | C6  | .H8    | 3.0900     |
| C8 | .C5   | 3.237(2)   | C7  | .H3_E  | 2.9200     |
| C8 | .C6   | 2.182(2)   | C8  | .H5    | 2.7400     |
| C8 | .N3_I | 3.407(2)   | C8  | .H3_E  | 3.0700     |
| C8 | .N2   | 3.2163(18) | C8  | .H6    | 3.0700     |



**Table S19.** CONTACT DISTANCES(ANGSTROM) (CONTINUED)

FOR: CSG503B\_A P 21/N R = 0.04

|     |        |           |     |        |        |
|-----|--------|-----------|-----|--------|--------|
| C9  | .H1_D  | 3.011(18) | H5  | .C10_I | 3.0700 |
| C9  | .H7_G  | 3.0800    | H6  | .C8    | 3.0700 |
| C9  | .H11   | 3.0800    | H6  | .H7    | 2.4700 |
| C10 | .H5_C  | 3.0700    | H6  | .O1_J  | 2.6600 |
| C11 | .H9    | 3.0700    | H7  | .O1_K  | 2.7400 |
| C11 | .H2_I  | 3.0100    | H7  | .H6    | 2.4700 |
| H1  | .C2    | 2.960(18) | H7  | .H8    | 2.4800 |
| H1  | .N1_D  | 2.190(19) | H7  | .N7_G  | 2.9300 |
| H1  | .N7_D  | 2.162(18) | H7  | .C9_G  | 3.0800 |
| H1  | .C9_D  | 3.011(18) | H8  | .N6    | 2.7000 |
| H2  | .O1    | 2.3000    | H8  | .N7    | 2.9000 |
| H2  | .N2    | 2.5300    | H8  | .C1    | 2.8500 |
| H2  | .N3    | 2.5600    | H8  | .C6    | 3.0900 |
| H2  | .C11_C | 3.0100    | H8  | .H7    | 2.4800 |
| H3  | .C5    | 3.0700    | H8  | .N3_I  | 2.5200 |
| H3  | .H4    | 2.4600    | H8  | .C3_I  | 2.8500 |
| H3  | .N4_H  | 2.9500    | H9  | .C11   | 3.0700 |
| H3  | .N5_H  | 2.8000    | H9  | .H10   | 2.4600 |
| H3  | .C6_H  | 2.7300    | H9  | .N5_L  | 2.5900 |
| H3  | .C7_H  | 2.9200    | H10 | .H9    | 2.4600 |
| H3  | .C8_H  | 3.0700    | H10 | .H11   | 2.4700 |
| H4  | .H3    | 2.4600    | H10 | .C3_L  | 3.0100 |
| H4  | .H5    | 2.4800    | H10 | .C4_L  | 2.9700 |
| H5  | .N4    | 2.6700    | H11 | .N2    | 2.5600 |
| H5  | .C1    | 2.8400    | H11 | .N3    | 2.6800 |
| H5  | .C3    | 3.0800    | H11 | .C1    | 2.8300 |
| H5  | .C8    | 2.7400    | H11 | .C5    | 2.9800 |
| H5  | .H4    | 2.4800    | H11 | .C9    | 3.0800 |

**Table S20. CONTACT DISTANCES(ANGSTROM) (CONTINUED)**

FOR: CSG503B\_A P 21/N R = 0.04

H11 .H10 2.4700 H11 .O1\_I 2.6800

**Table S21. HYDROGEN BONDS (ANGSTROM. DEG)**

FOR: CSG503B\_A P 21/N R = 0.04

O1 -- H1 .. N1 0.961(19) 2.190(19) 3.0045(14) 141.7(15) 3\_666

O1 -- H1 .. N7 0.961(19) 2.162(18) 2.9275(16) 135.7(14) 3\_666

C8 -- H8 .. N3 0.9300 2.5200 3.407(2) 159.00 2\_545

C9 -- H9 .. N5 0.9300 2.5900 3.4846(18) 161.00 4\_455

TRANSLATION OF SYMMETRY CODE TO EQUIV.POS

A=[ 1565.00] = [ 1\_565] = X.1+Y.Z

B=[ 2655.00] = [ 2\_655] = 3/2-X.1/2+Y.1/2-Z

C=[ 2555.00] = [ 2\_555] = 1/2-X.1/2+Y.1/2-Z

D=[ 3666.00] = [ 3\_666] = 1-X.1-Y.1-Z

E=[ 4555.00] = [ 4\_666] = 1/2+X.1/2-Y.1/2+Z

F=[ 4554.00] = [ 4\_665] = 1/2+X.1/2-Y.-1/2+Z

G=[ 3656.00] = [ 3\_656] = 1-X.-Y.1-Z

H=[ 4454.00] = [ 4\_565] = -1/2+X.1/2-Y.-1/2+Z

I=[ 2545.00] = [ 2\_545] = 1/2-X.-1/2+Y.1/2-Z

J=[ 2645.00] = [ 2\_645] = 3/2-X.-1/2+Y.1/2-Z

K=[ 1545.00] = [ 1\_545] = X.-1+Y.Z

L=[ 4455.00] = [ 4\_566] = -1/2+X.1/2-Y.1/2+Z

## 8. References

1. H. Brintzinger and R. Titzmann, *Chem. Ber.*, 1952, **85**, 344.
2. T. M. V. D. Pinho e Melo, A. Lemos and C. Grosso, *Synlett*, 2014, **25**, 2868-2872.
3. D. Martini, M. Pellei, C. Pettinari, B. W. Skelton and A. H. White, *Inorg. Chim. Acta*, 2002, **333**, 72-82.
4. A. G. Mahmoud, L. M. D. R. S. Martins, M. F. C. Guedes da Silva and A. J. L. Pombeiro, *Inorg. Chim. Acta*, 2018, **483**, 371-378.
